# Supplementary material
Source: publisher figshare collection journal article supplement (https://acs.figshare.com/ndownloader/files/3913765)
Supplement: Supplementary file 1 [file 3913765]

# SUPPORTING INFORMATION

## Chemoenzymatic Convergent Synthesis of 2'-O,4'-C-Methyleneribonucleosides

Vivek K. Sharma,<sup>a</sup> Manish Kumar,<sup>a</sup> Carl E. Olsen<sup>b</sup> and Ashok K. Prasad<sup>a\*</sup>

<sup>a</sup>Bioorganic Laboratory, Department of Chemistry, University of Delhi, Delhi-110 007, India; <sup>b</sup>Faculty of Life Sciences, Department of Plant and Environmental Sciences, University of Copenhagen, DK- 1871 Frederiksberg C, Denmark

### \*Corresponding Author

**Ashok K. Prasad:** Bioorganic Laboratory, Department of Chemistry, University of Delhi, Delhi-110 007, India; Phone: 00-91-11-27662486; E-mail: ashokenzyme@yahoo.com.

Copy of <sup>1</sup>H- and <sup>13</sup>C NMR spectra of 7-12, 13a-d, 14a-d and 15a-d are enclosed in this supporting information.

|                                                                                                             |      |
|-------------------------------------------------------------------------------------------------------------|------|
| General information.....                                                                                    | S.2  |
| SI-Scheme-1.....                                                                                            | S.3  |
| SI-Table-1.....                                                                                             | S.3  |
| <sup>1</sup> H- and <sup>13</sup> C NMR Spectra of compound 7.....                                          | S.4  |
| <sup>1</sup> H- <sup>1</sup> H COSY and <sup>1</sup> H- <sup>13</sup> C HMQC NMR Spectra of compound 7..... | S.5  |
| <sup>1</sup> H- and <sup>13</sup> C NMR Spectra of compound 8.....                                          | S.6  |
| <sup>1</sup> H- and <sup>13</sup> C NMR Spectra of compound 9.....                                          | S.7  |
| <sup>1</sup> H- and <sup>13</sup> C NMR Spectra of compound 10.....                                         | S.8  |
| <sup>1</sup> H- and <sup>13</sup> C NMR Spectra of compound 11.....                                         | S.9  |
| <sup>1</sup> H- and <sup>13</sup> C NMR Spectra of compound 12.....                                         | S.10 |
| <sup>1</sup> H- and <sup>13</sup> C NMR Spectra of compound 13a.....                                        | S.11 |
| <sup>1</sup> H- and <sup>13</sup> C NMR Spectra of compound 13b.....                                        | S.12 |
| <sup>1</sup> H- and <sup>13</sup> C NMR Spectra of compound 13c.....                                        | S.13 |
| <sup>1</sup> H- and <sup>13</sup> C NMR Spectra of compound 13d.....                                        | S.14 |
| <sup>1</sup> H- and <sup>13</sup> C NMR Spectra of compound 14a.....                                        | S.15 |

|                                                                           |             |
|---------------------------------------------------------------------------|-------------|
| <b><sup>1</sup>H- and <sup>13</sup>C NMR Spectra of compound 14b.....</b> | <b>S.16</b> |
| <b><sup>1</sup>H- and <sup>13</sup>C NMR Spectra of compound 14c.....</b> | <b>S.17</b> |
| <b><sup>1</sup>H- and <sup>13</sup>C NMR Spectra of compound 14d.....</b> | <b>S.18</b> |
| <b><sup>1</sup>H- and <sup>13</sup>C NMR Spectra of compound 15a.....</b> | <b>S.19</b> |
| <b><sup>1</sup>H- and <sup>13</sup>C NMR Spectra of compound 15b.....</b> | <b>S.20</b> |
| <b><sup>1</sup>H- and <sup>13</sup>C NMR Spectra of compound 15c.....</b> | <b>S.21</b> |
| <b><sup>1</sup>H- and <sup>13</sup>C NMR Spectra of compound 15d.....</b> | <b>S.22</b> |
| <b>References.....</b>                                                    | <b>S.23</b> |

## General information

Reactions were conducted under an atmosphere of nitrogen when anhydrous solvents were used. The IR spectra were recorded by making KBr disc for solid samples and thin film for oils. The optical rotations were measured using light of 589 nm wavelegth. The <sup>1</sup>H- and <sup>13</sup>C NMR spectra were recorded at 400 and 100.6 MHz, respectively, using TMS as internal standard. The chemical shift values are on δ scale and the coupling constants (*J*) are in Hz. Signals from OH and NH groups in <sup>1</sup>H NMR spectra recorded in DMSO-*d*<sub>6</sub> were verified by removing them by D<sub>2</sub>O exchange method. Analytical TLCs were performed on pre-coated silica gel 60F<sub>254</sub> plates; the spots were detected either using UV light or by charring with 4% alcoholic sulfuric acid. Silica gel (100-200 mesh) was used for column chromatography.

**SI-Scheme 1.** Literature convergent synthesis of LNA monomers.<sup>1,2</sup>

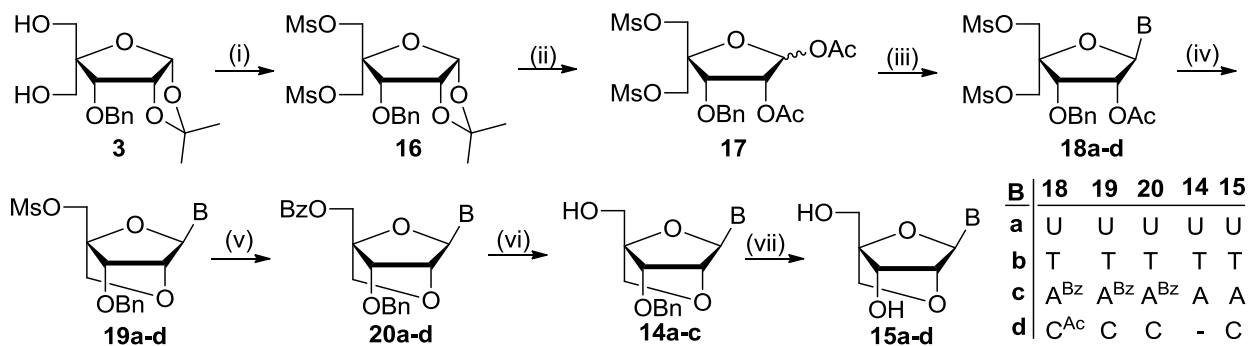

*Reagents (% yields):* (i) MsCl, pyridine, CH<sub>2</sub>Cl<sub>2</sub> (98%); (ii) Ac<sub>2</sub>O, AcOH, conc. H<sub>2</sub>SO<sub>4</sub> (97%); (iii) nucleobase, *N,O*-bis(trimethylsilyl)acetamide, TMS-triflate, CH<sub>3</sub>CN or 1,2-dichloroethane (**18a**, 90%; **18b**, 88%; **18c**, 68%; **18d**, 82%); (iv) aq. NaOH, THF or dioxane (**19a**, 97%; **19b**, 94%; **19c**, 78%; **19d**, 87%); (v) NaOBz, DMF (**20a**, 97%; **20b**, 86%; **20c**, 88%; **20d**, 93%); (vi) aq. NaOH, THF (**14a**, 95%; **14b**, 91%); NH<sub>4</sub>OH, MeOH (**14c**, 86%); (a) 20% Pd(OH)<sub>2</sub>/C, HCO<sub>2</sub>NH<sub>4</sub>, MeOH; (b) NH<sub>4</sub>OH (**15d**, 77%); (vii) 20% Pd(OH)<sub>2</sub>/C, 88% HCOOH, THF/MeOH (9:1) (**15a**, 91%); 20% Pd(OH)<sub>2</sub>/C, HCO<sub>2</sub>NH<sub>4</sub>, MeOH/EtOH (**15b**, 83%; **15c**, 91%).

**SI-Table 1.** Comparison of overall yields of LNA monomers in literature convergent synthesis with modified chemo-enzymatic convergent synthesis.

| LNA monomer   | Overall yield (%) (SI-Scheme 1)* | Overall yield (%) (Scheme 3)* |
|---------------|----------------------------------|-------------------------------|
| U; <b>15a</b> | 69.6                             | 72.4                          |
| T; <b>15b</b> | 51.1                             | 63.9                          |
| A; <b>15c</b> | 34.7                             | 54.1                          |
| C; <b>15d</b> | 48.6                             | 55.9                          |

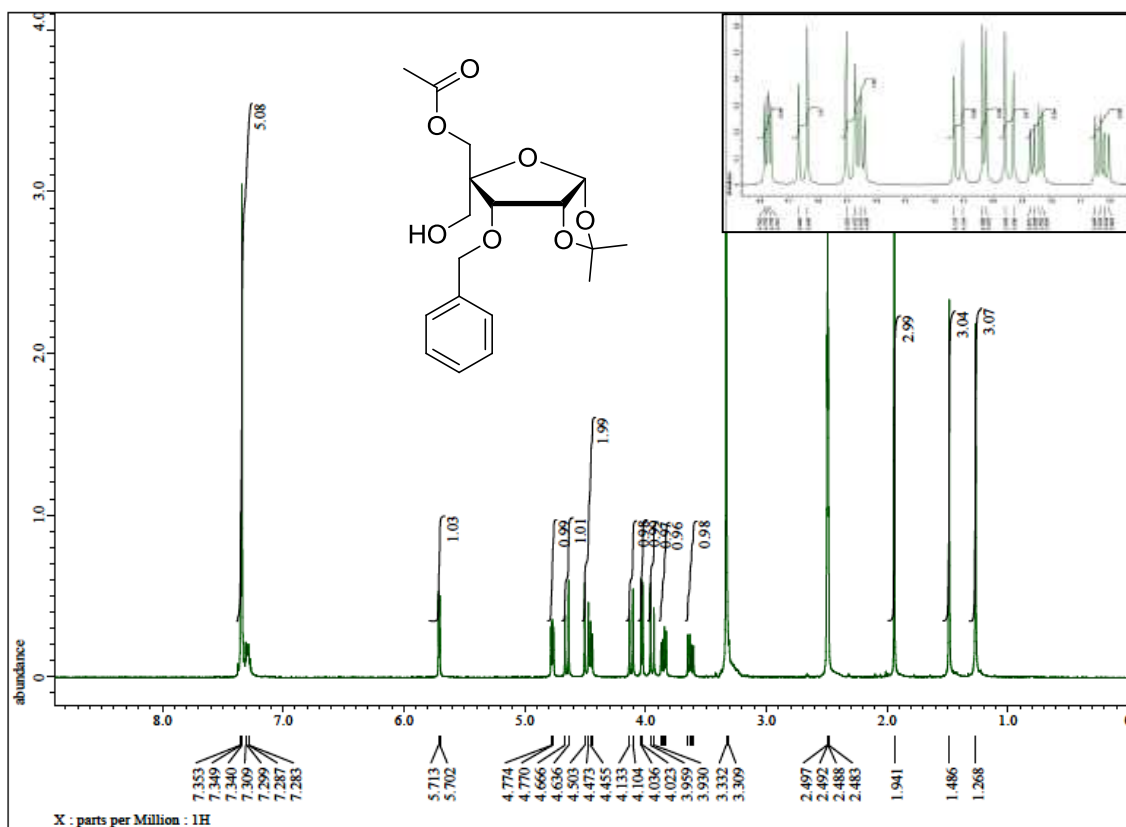

<sup>1</sup>H NMR spectrum of compound 7 (400 MHz, DMSO-*d*<sub>6</sub>)

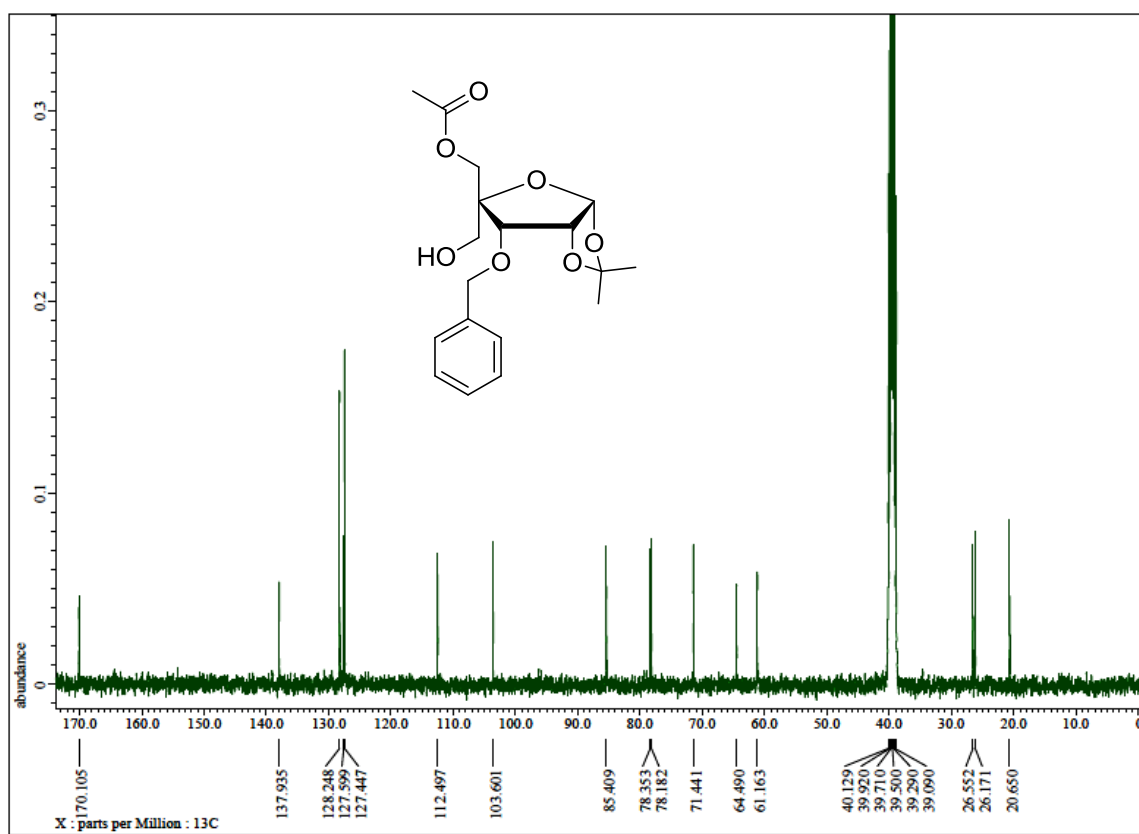

<sup>13</sup>C NMR spectrum of compound 7 (100.6 MHz, DMSO-*d*<sub>6</sub>)

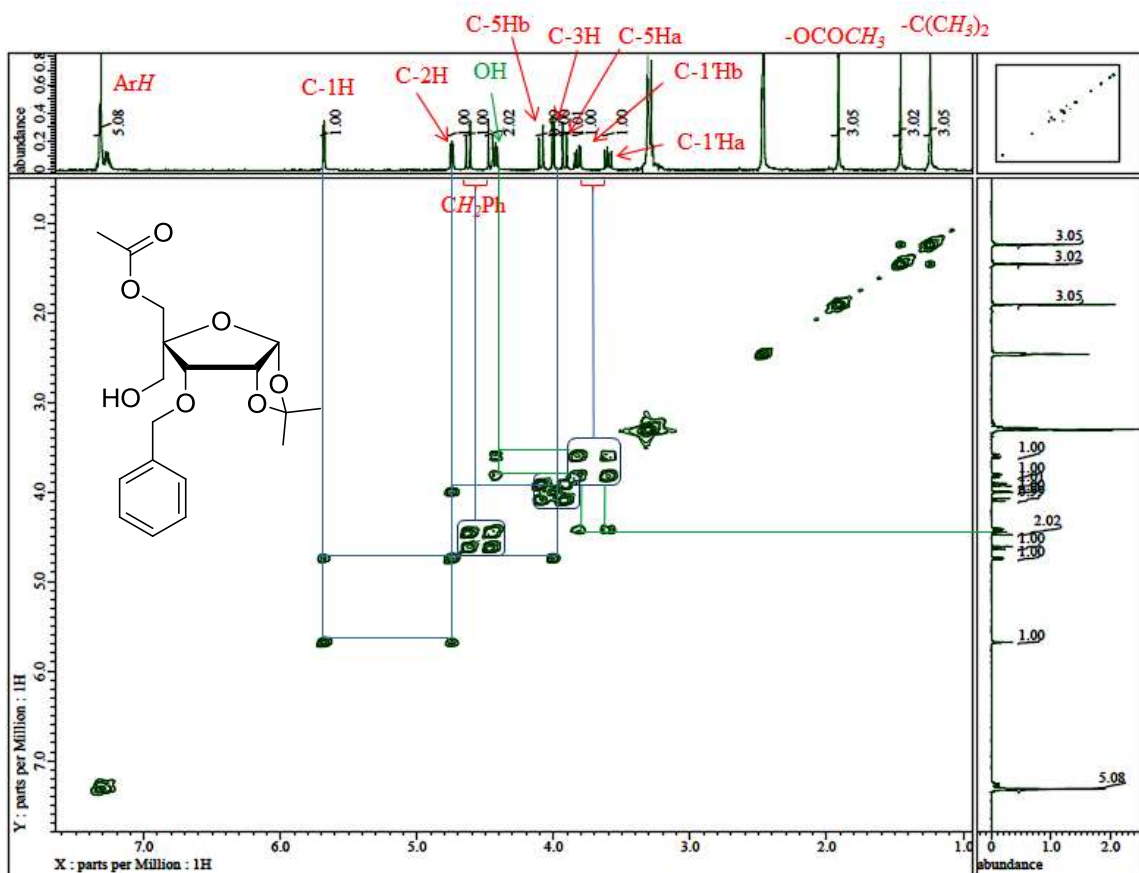

<sup>1</sup>H-<sup>1</sup>H COSY NMR spectrum of compound **7** (400 MHz, DMSO-*d*<sub>6</sub>)

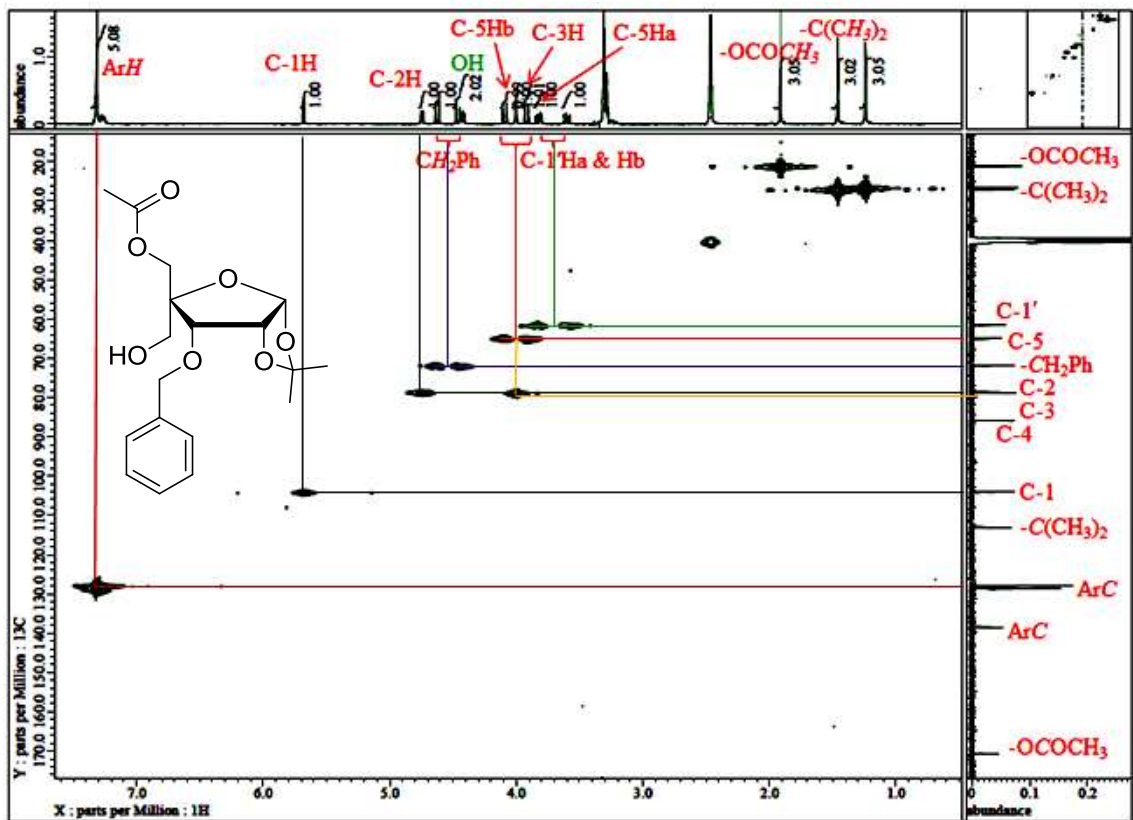

<sup>1</sup>H-<sup>13</sup>C NMR HMQC spectrum of compound **7** (400 MHz, DMSO-*d*<sub>6</sub>)

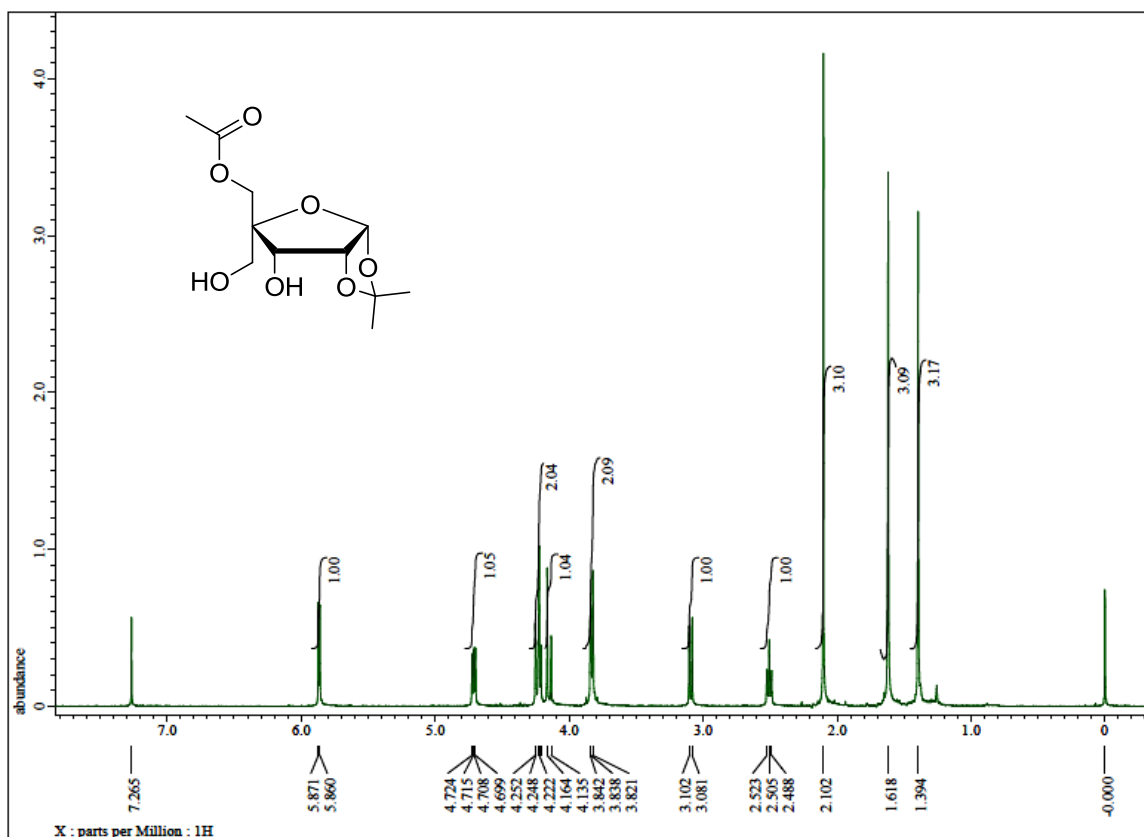

<sup>1</sup>H NMR spectrum of compound **8** (400 MHz, CDCl<sub>3</sub>)

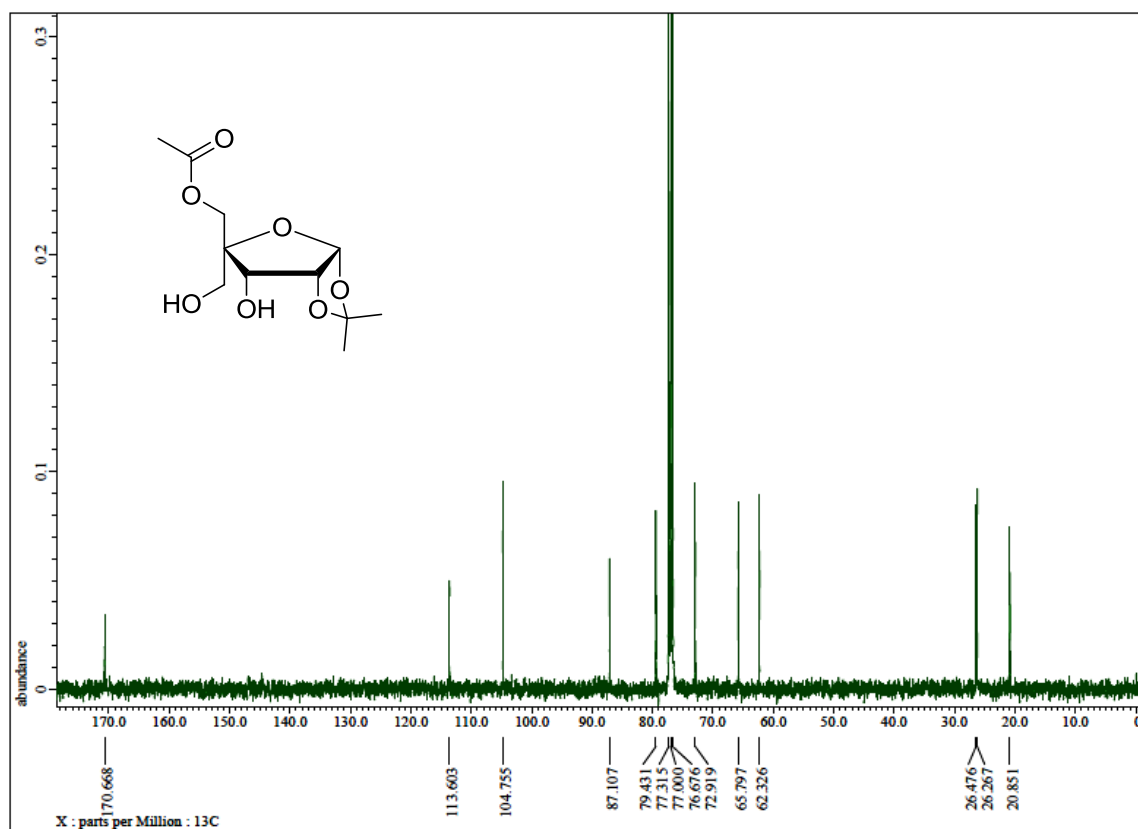

<sup>13</sup>C NMR spectrum of compound **8** (100.6 MHz, CDCl<sub>3</sub>)

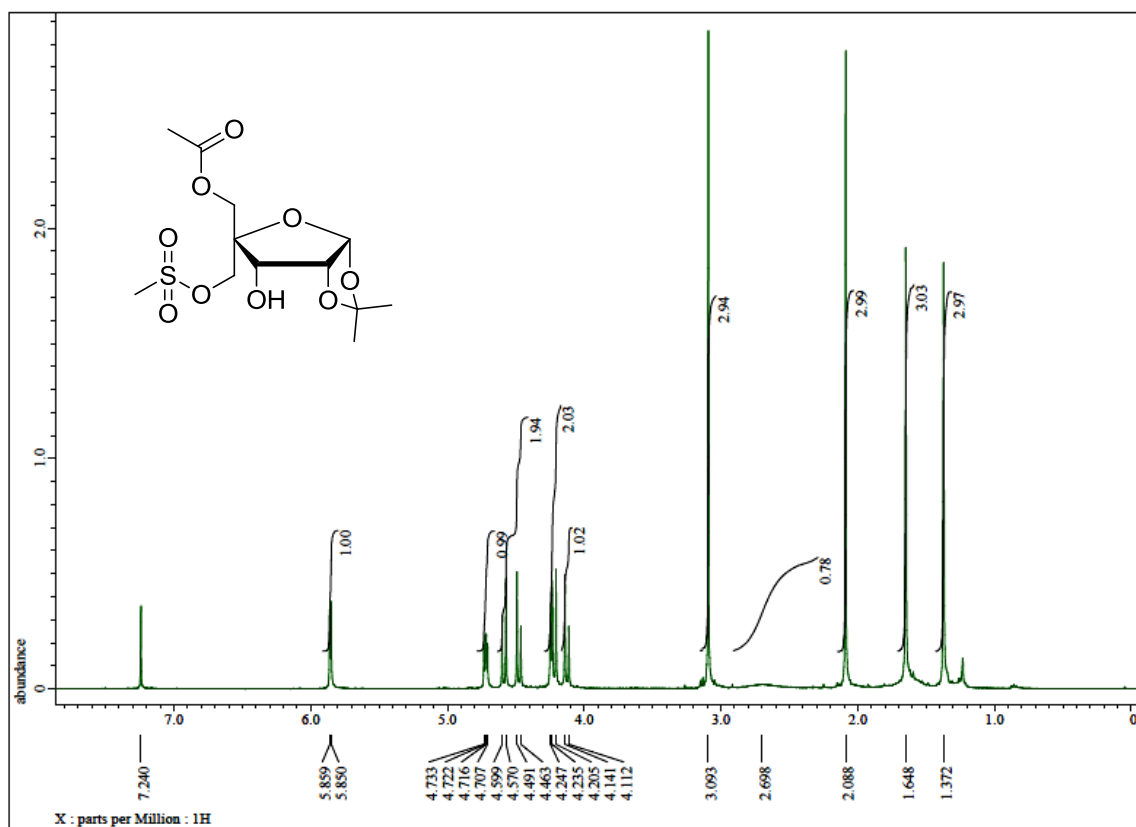

<sup>1</sup>H NMR spectrum of compound **9** (400 MHz, CDCl<sub>3</sub>)

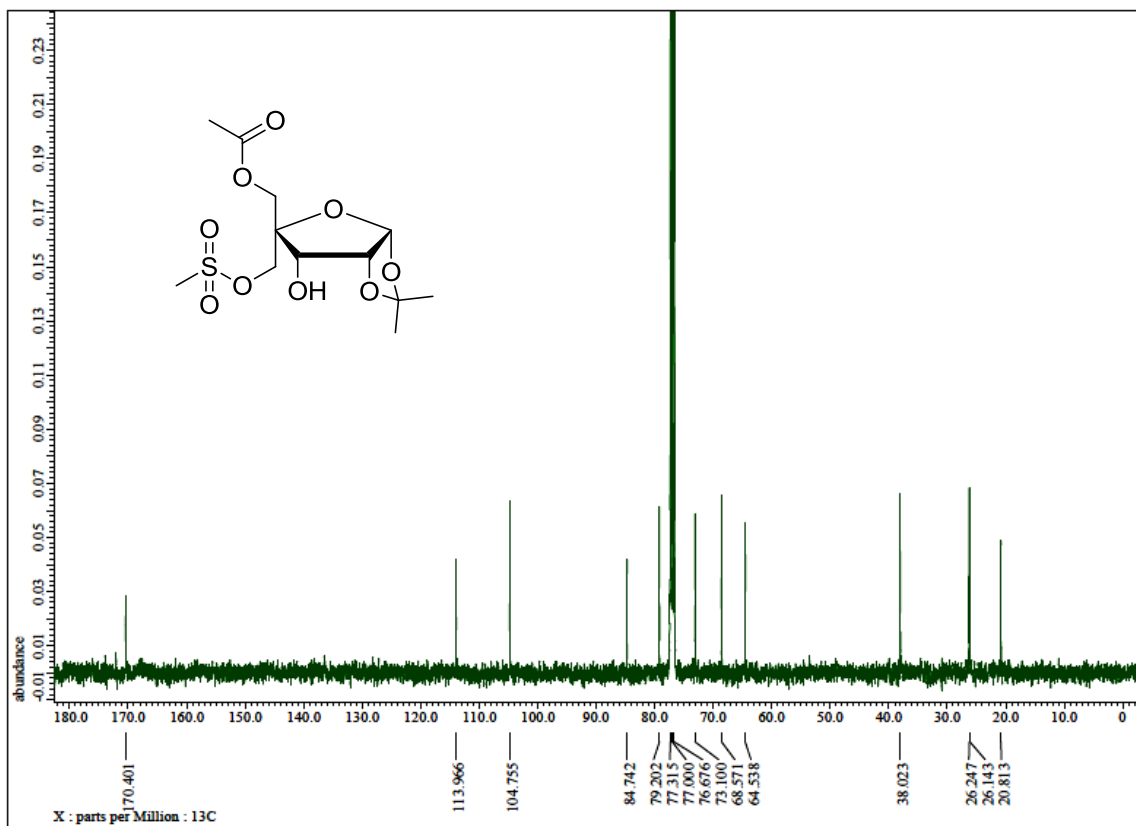

<sup>13</sup>C NMR spectrum of compound **9** (100.6 MHz, CDCl<sub>3</sub>)

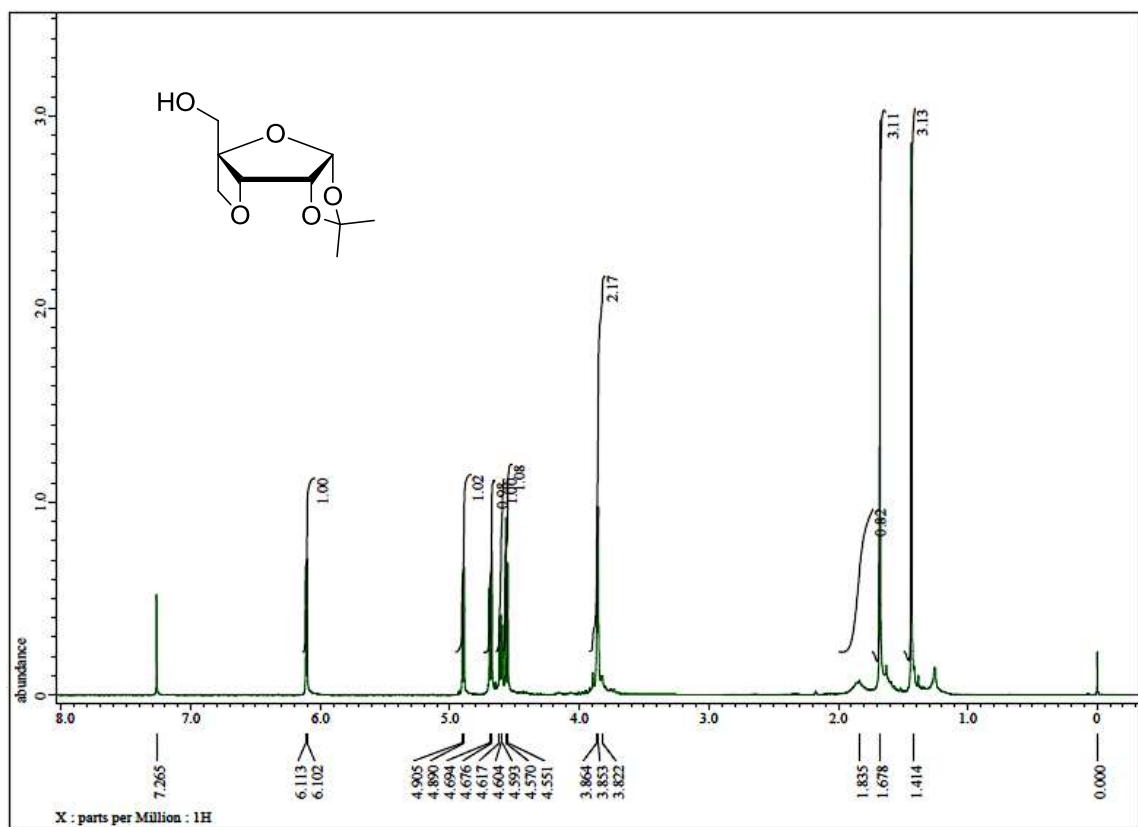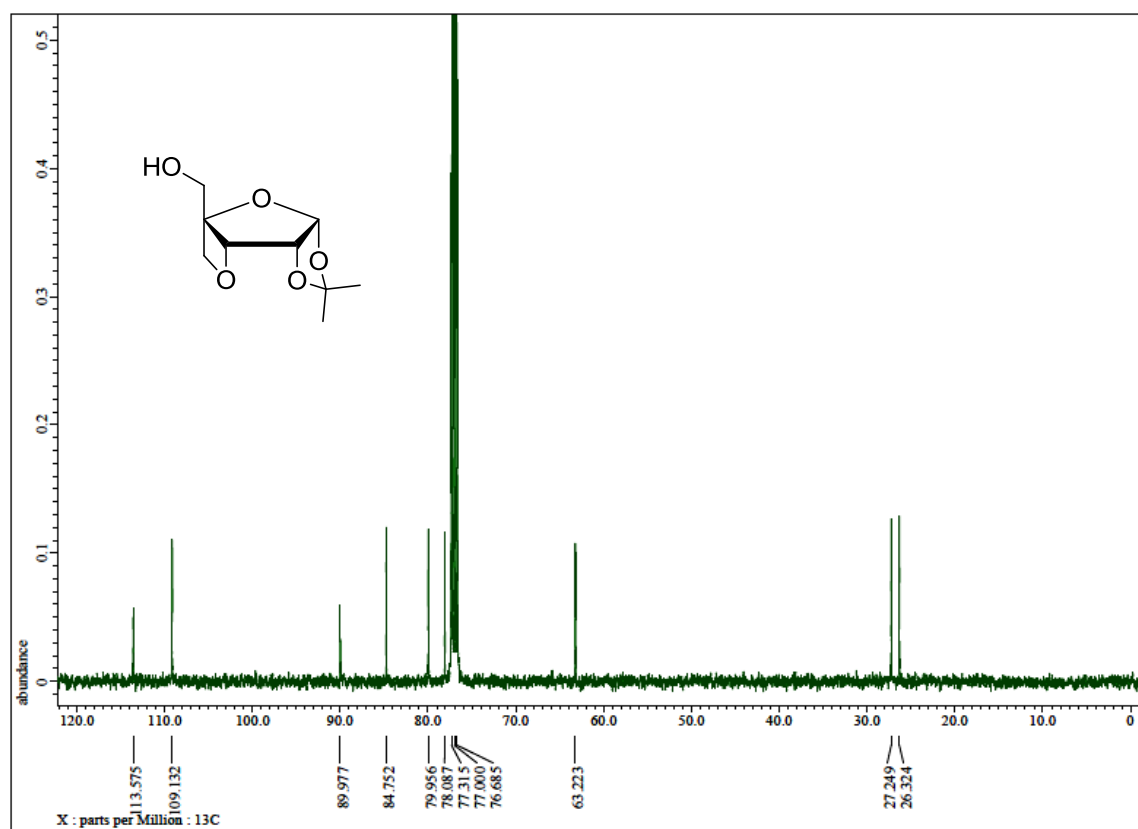



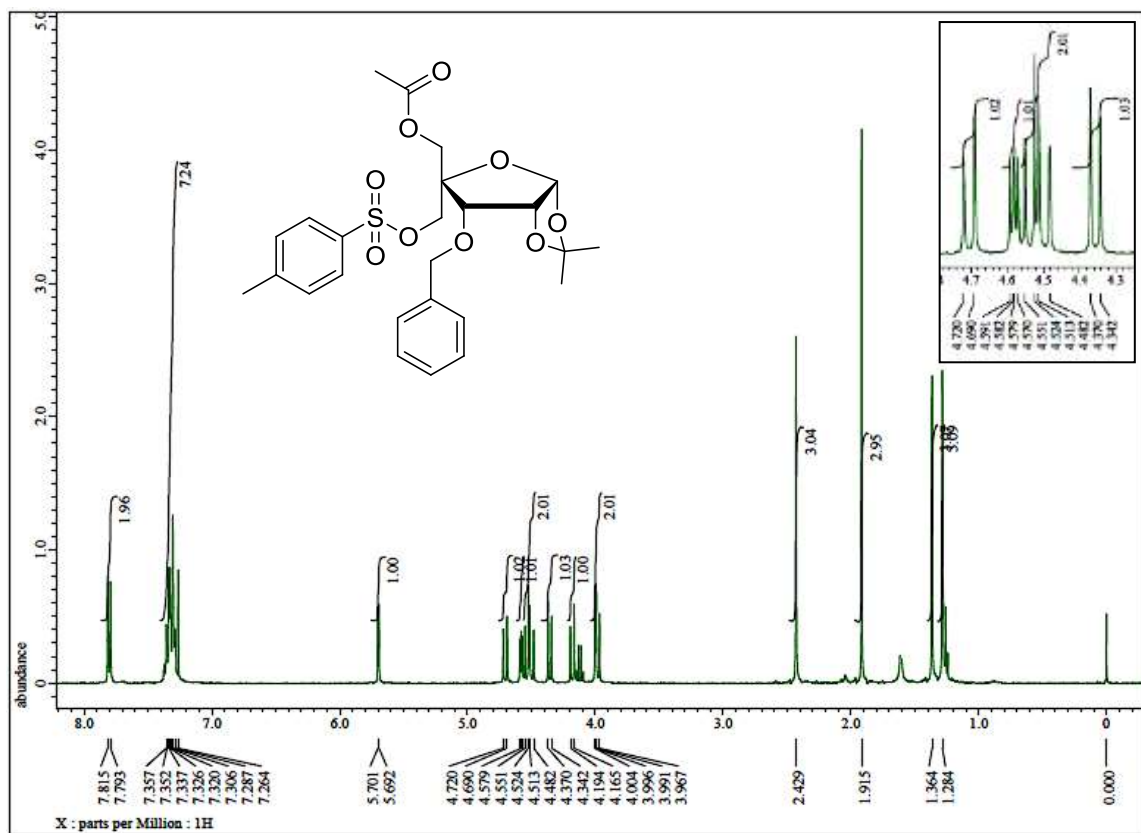

<sup>1</sup>H NMR spectrum of compound **11** (400 MHz, CDCl<sub>3</sub>)

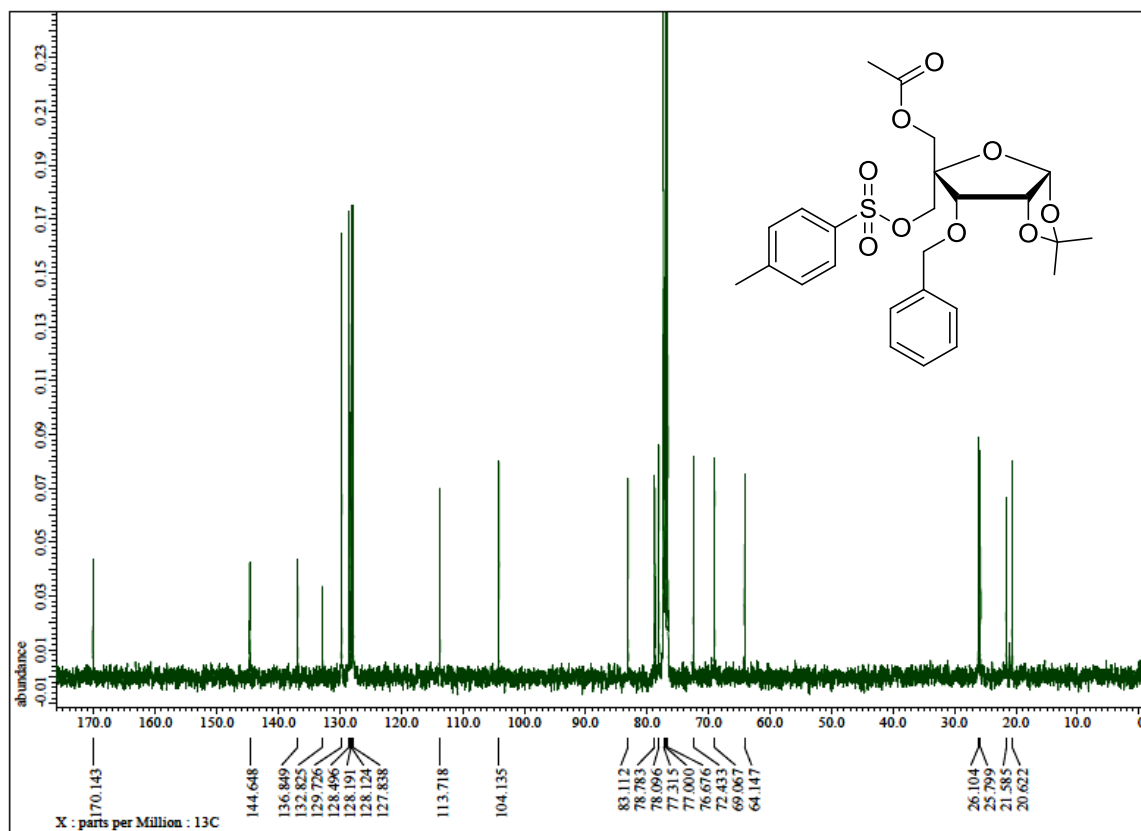

<sup>13</sup>C NMR spectrum of compound **11** (100.6 MHz, CDCl<sub>3</sub>)

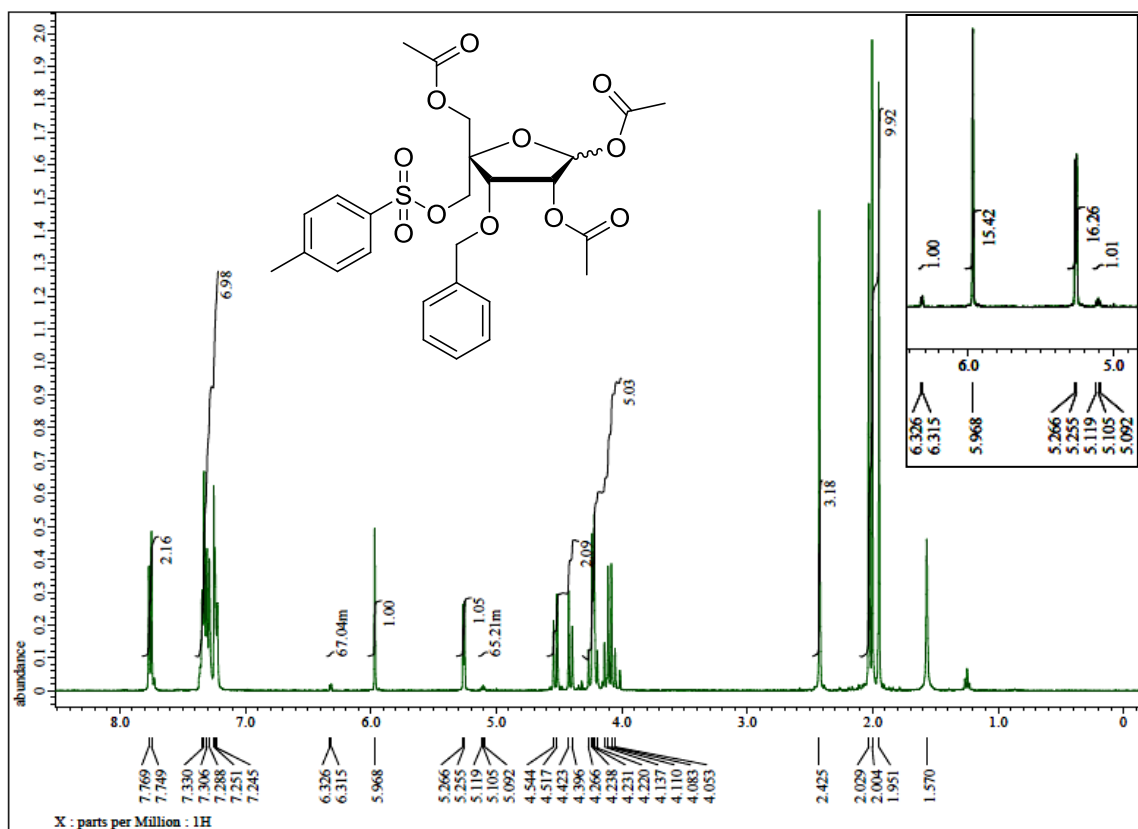

<sup>1</sup>H NMR spectrum of compound **12** (400 MHz, CDCl<sub>3</sub>)

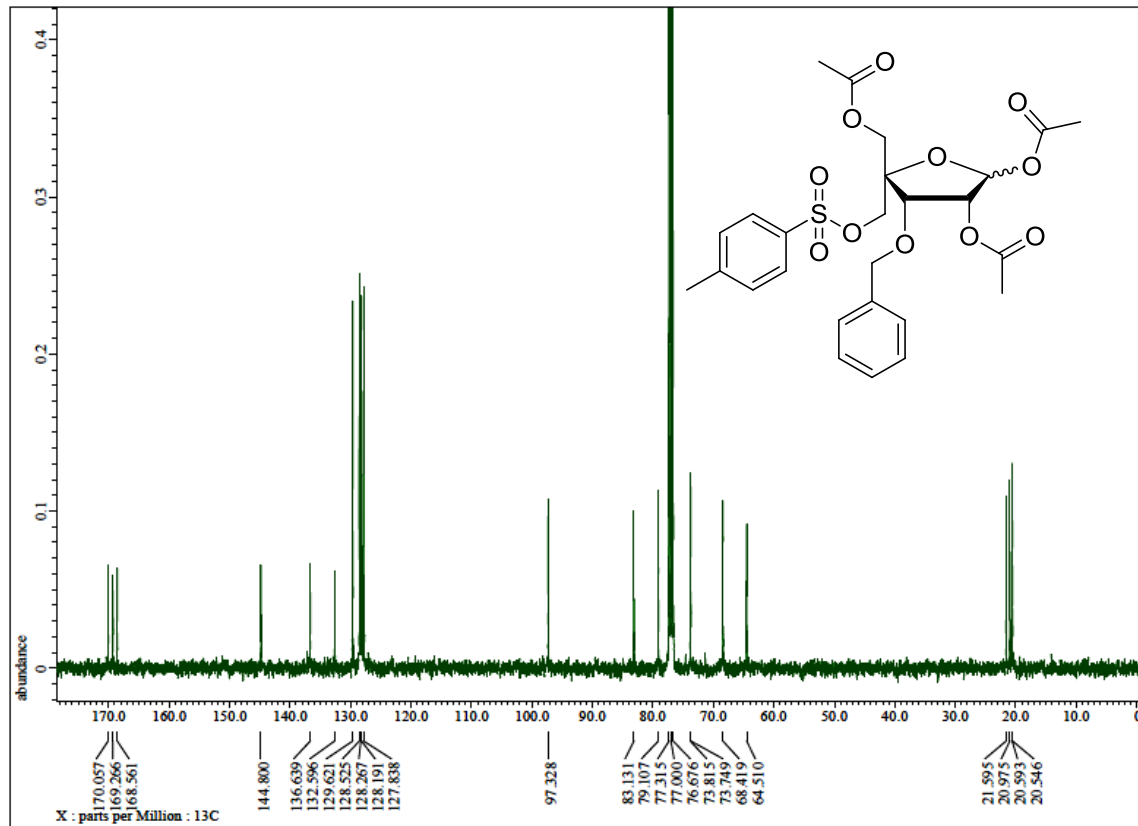

<sup>13</sup>C NMR spectrum of compound **12** (100.6 MHz, CDCl<sub>3</sub>)



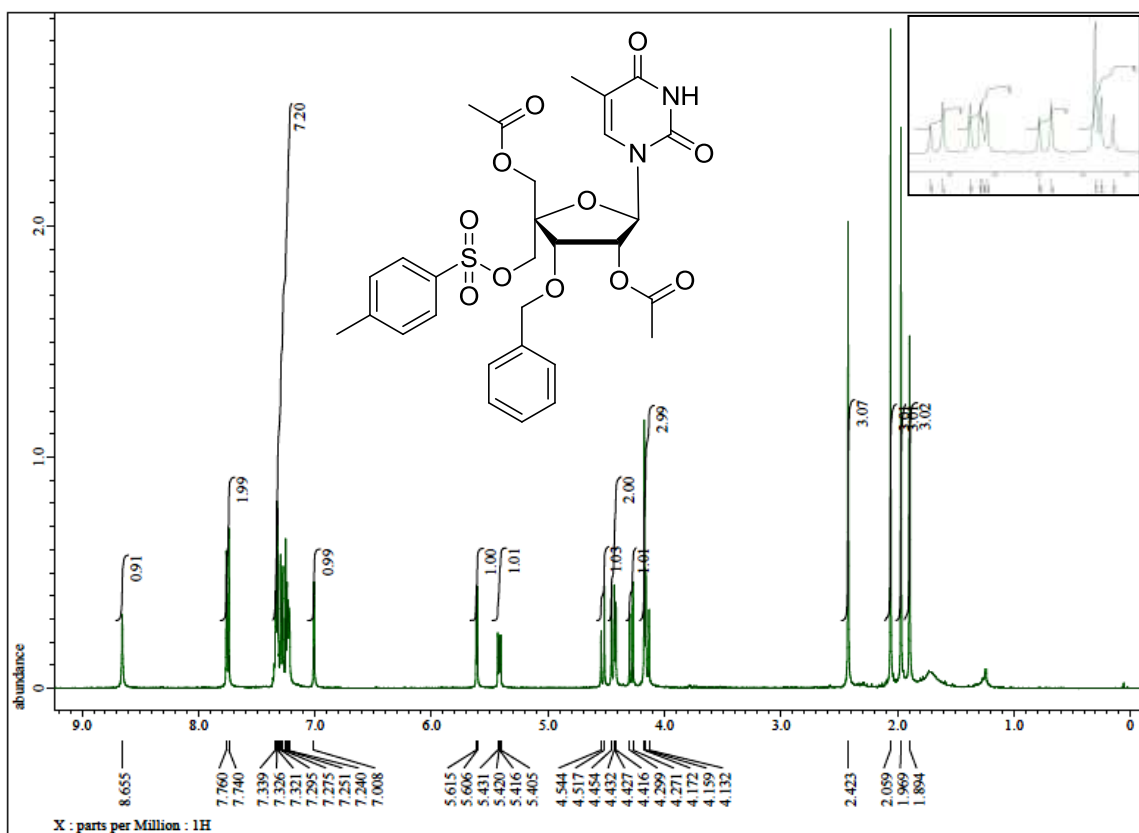

**<sup>1</sup>H NMR spectrum of compound **13b** (400 MHz, CDCl<sub>3</sub>)**

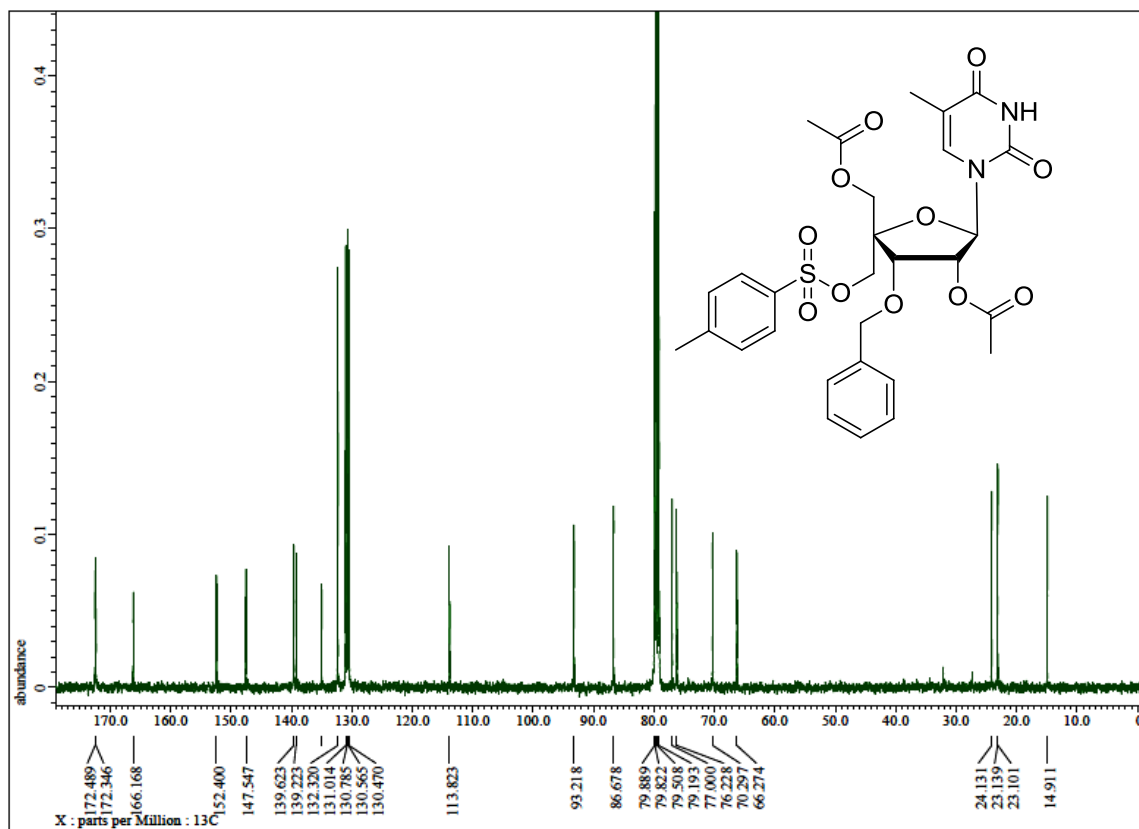

**<sup>13</sup>C NMR spectrum of compound **13b** (100.6 MHz, CDCl<sub>3</sub>)**

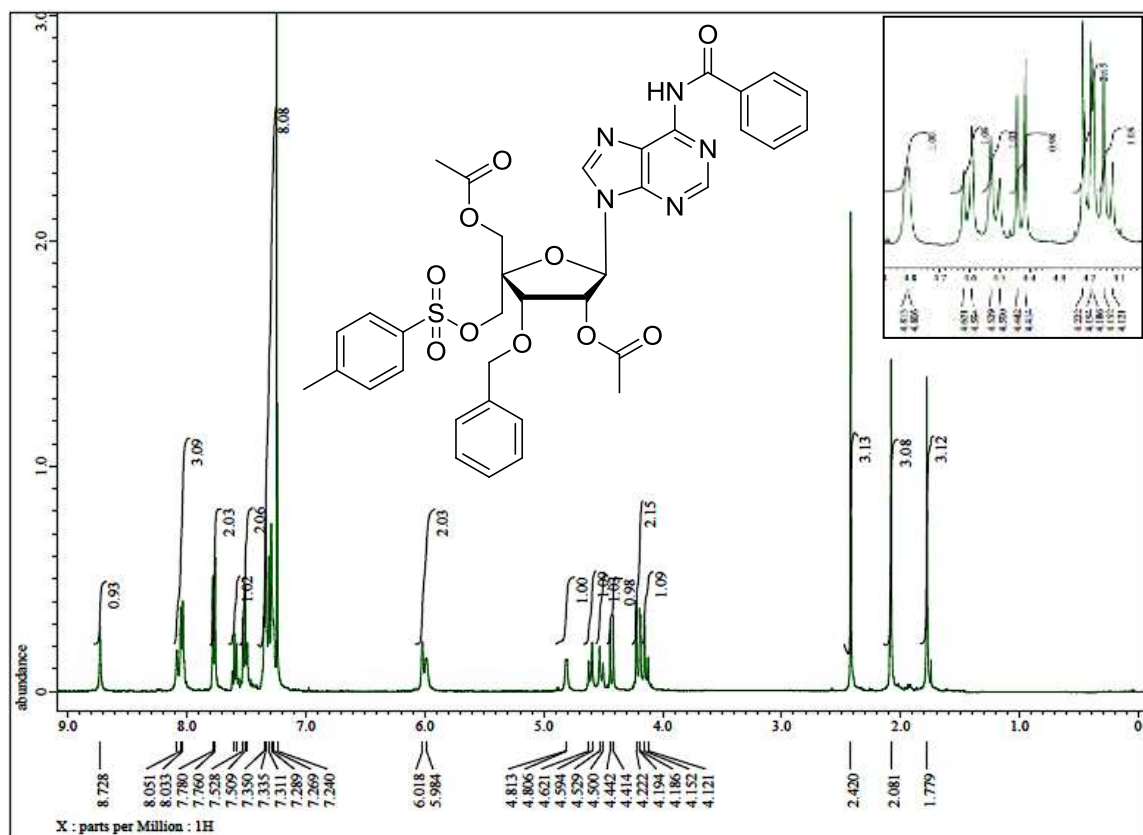

<sup>1</sup>H NMR spectrum of compound **13c** (400 MHz, CDCl<sub>3</sub>)

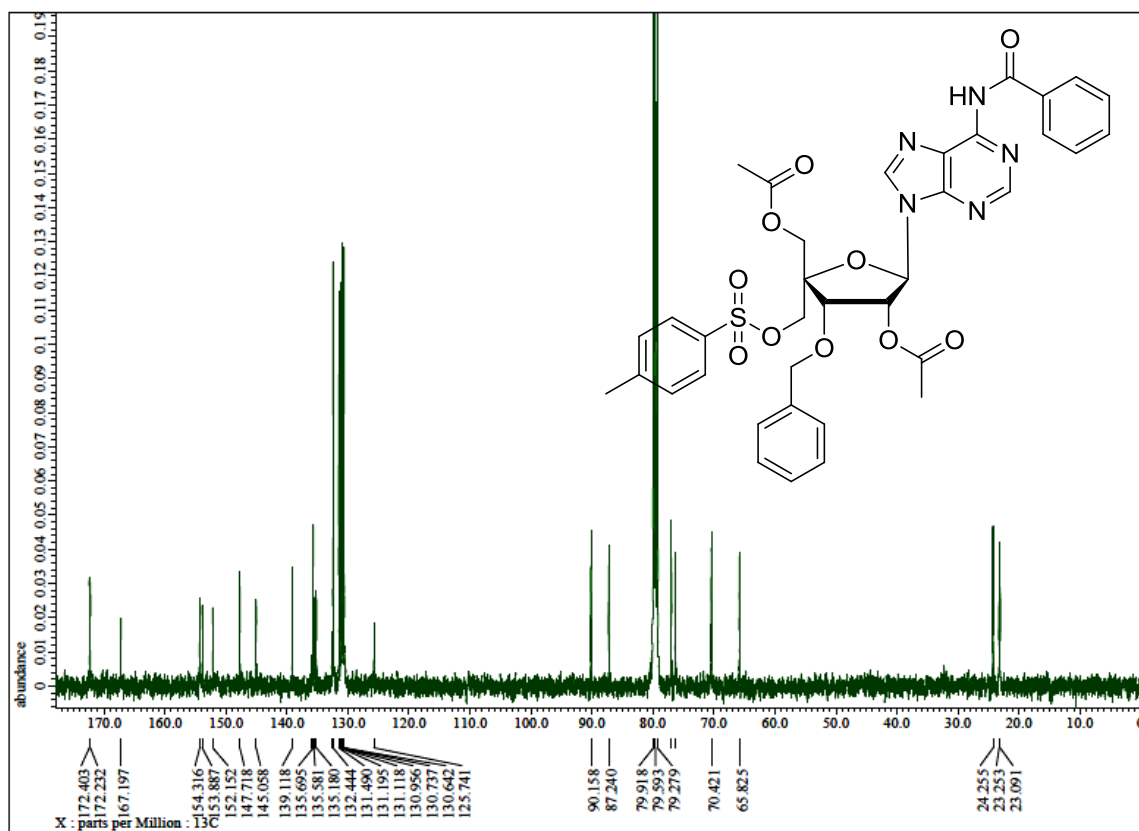

<sup>13</sup>C NMR spectrum of compound **13c** (100.6 MHz, CDCl<sub>3</sub>)

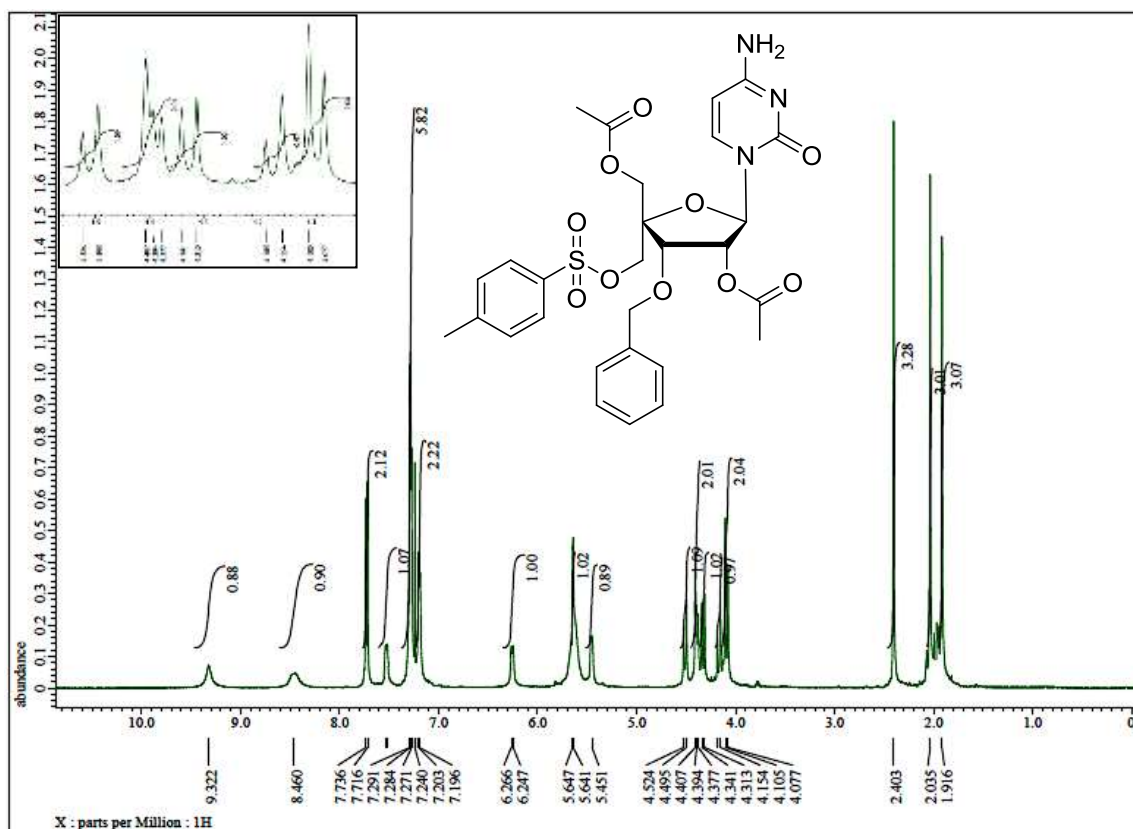

<sup>1</sup>H NMR spectrum of compound **13d** (400 MHz, CDCl<sub>3</sub>)

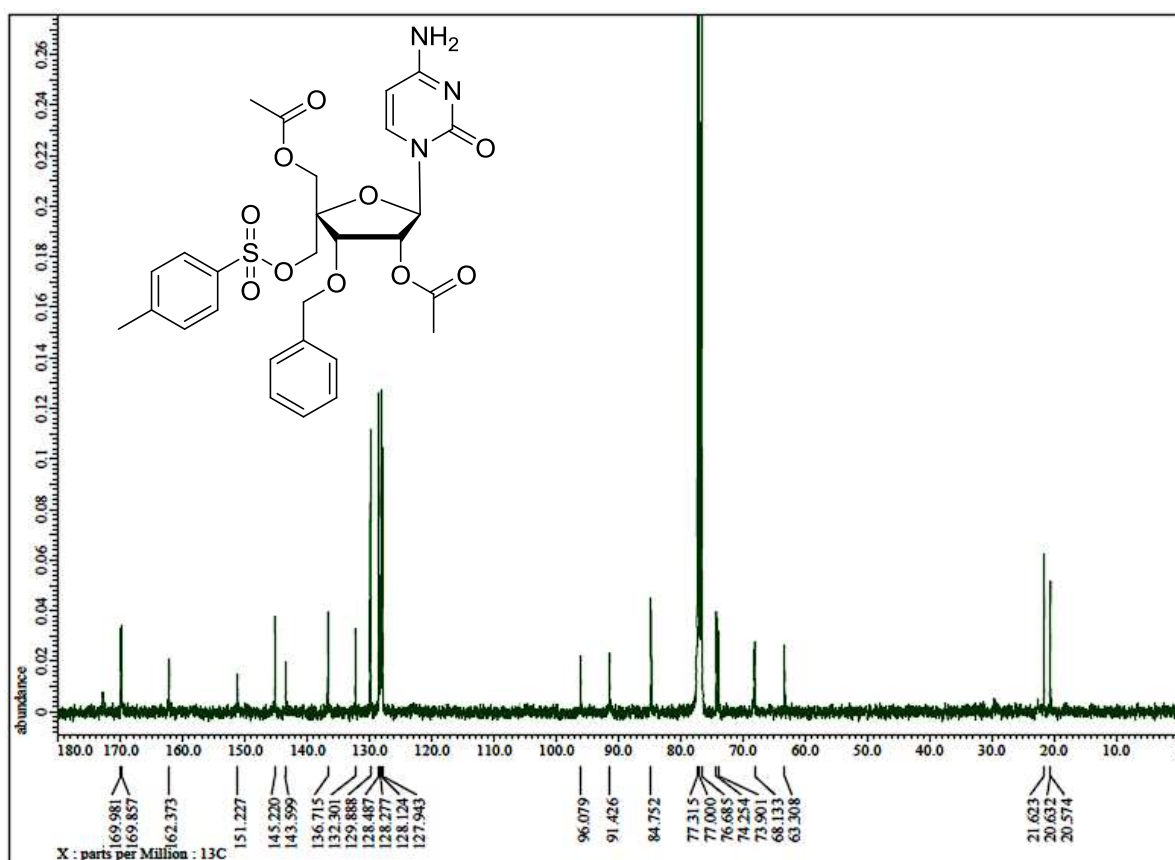

<sup>13</sup>C NMR spectrum of compound **13d** (100.6 MHz, CDCl<sub>3</sub>)

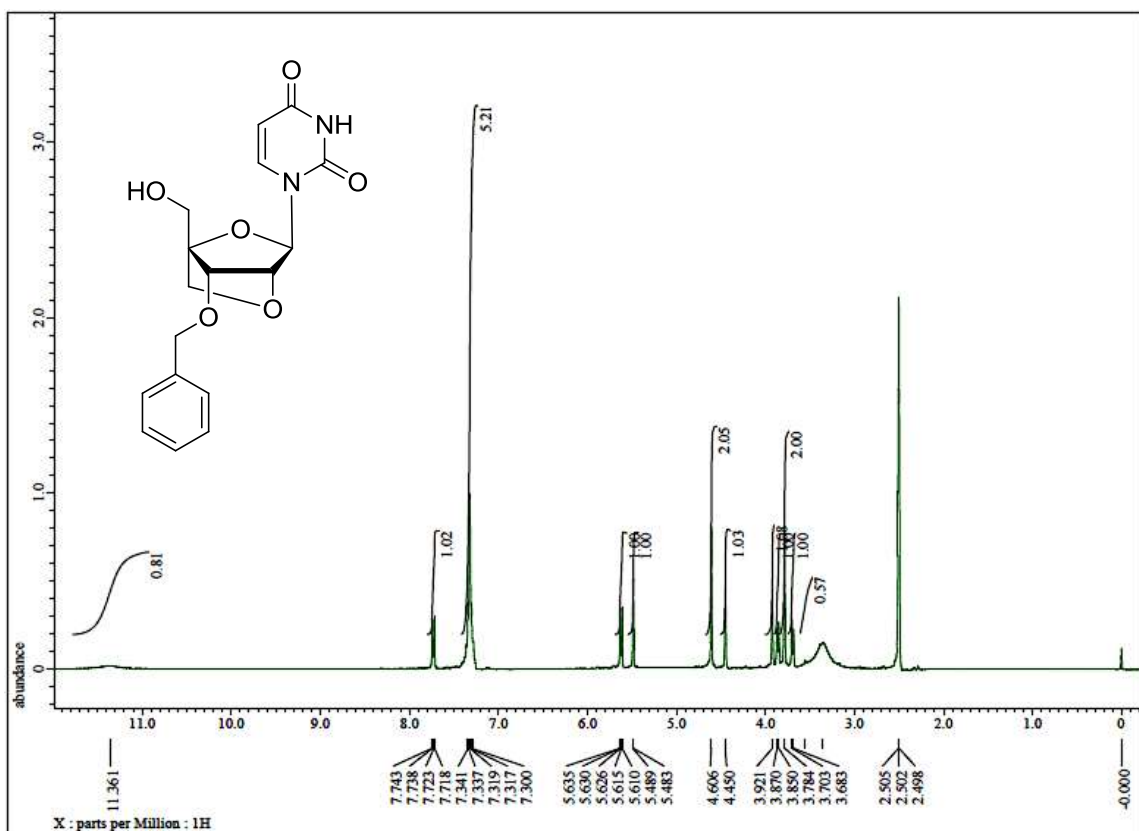

<sup>1</sup>H NMR spectrum of compound **14a** (400 MHz, DMSO-*d*<sub>6</sub>)

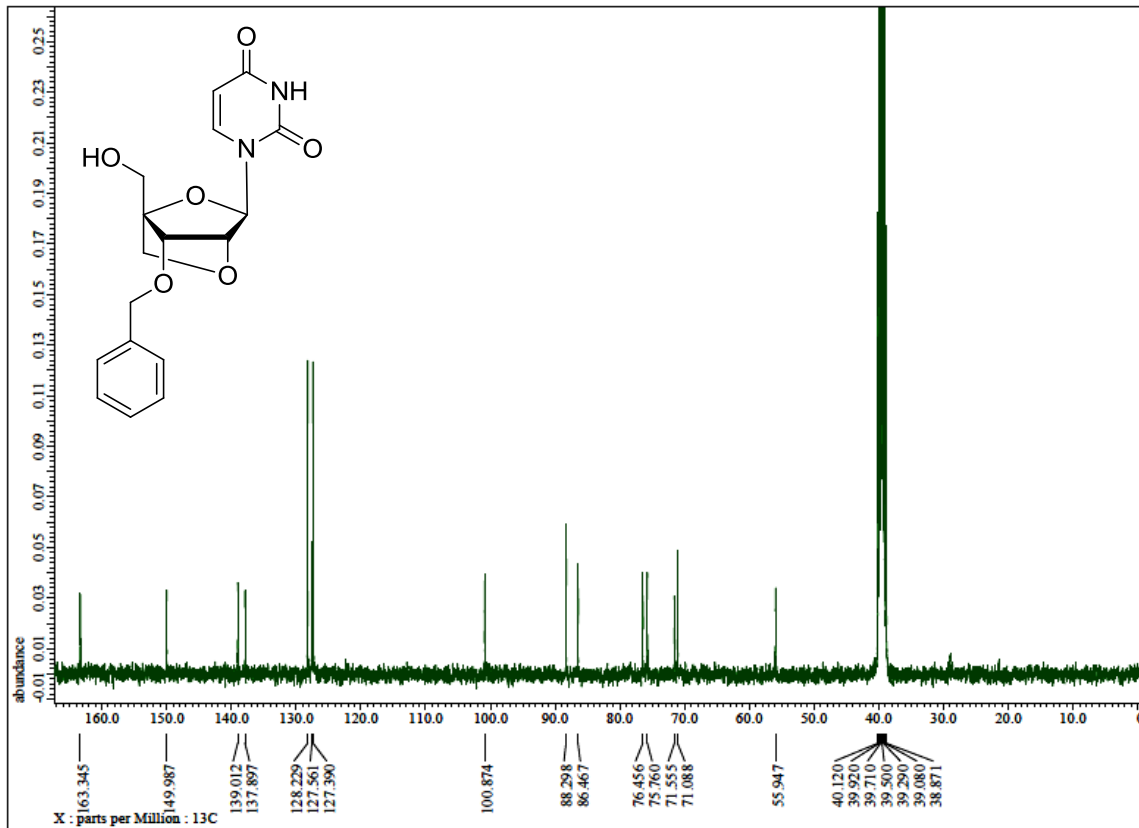

<sup>13</sup>C NMR spectrum of compound **14a** (100.6 MHz, DMSO-*d*<sub>6</sub>)

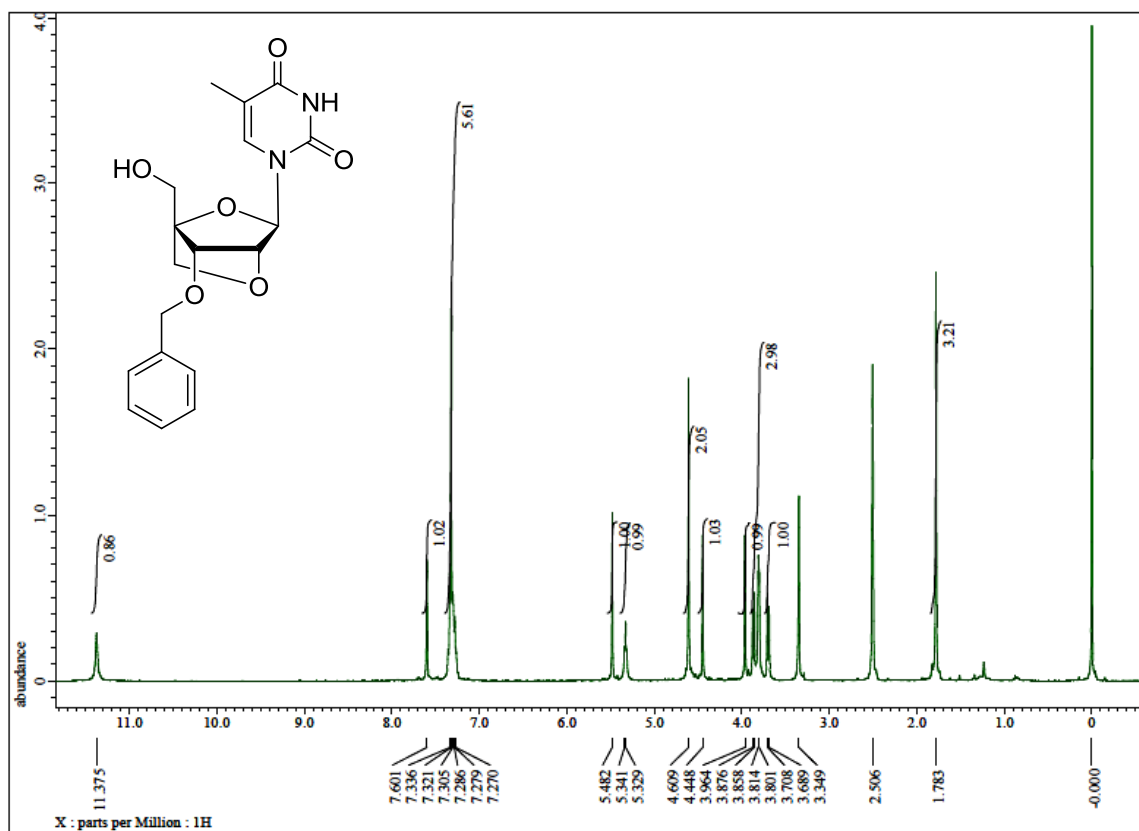

<sup>1</sup>H NMR spectrum of compound **14b** (400 MHz, DMSO-*d*<sub>6</sub>)

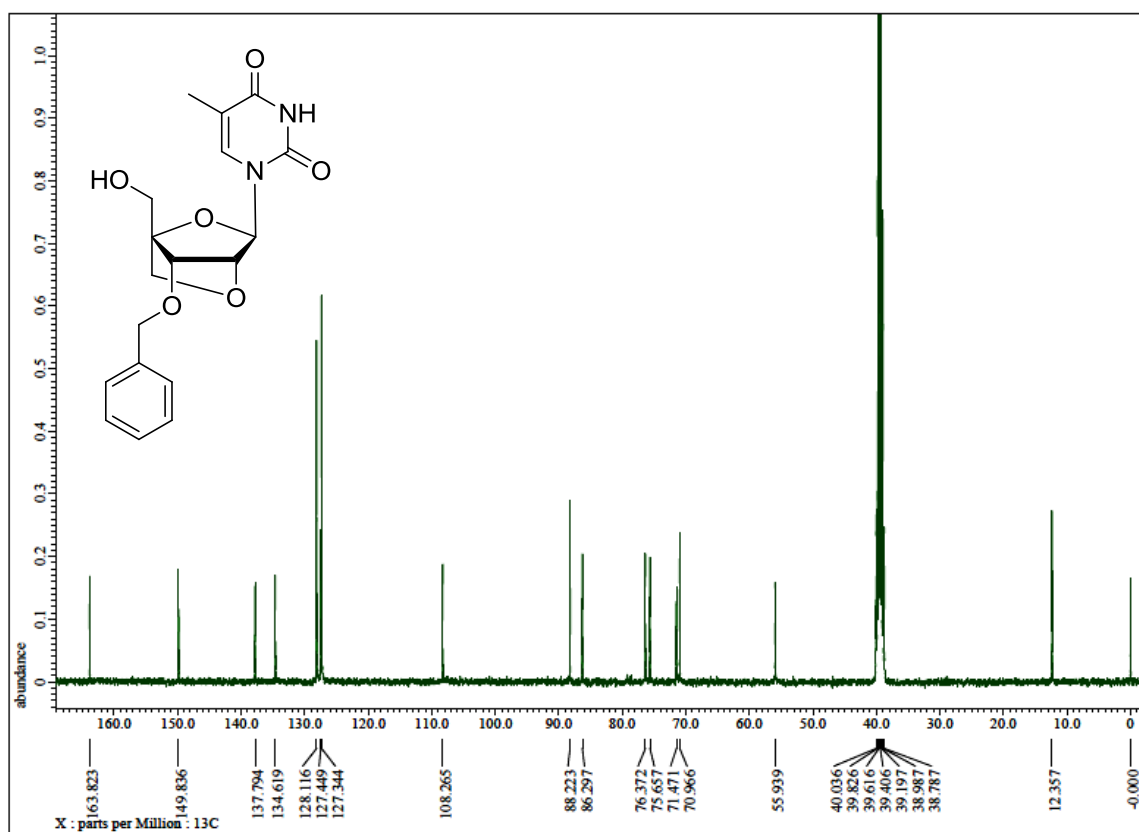

<sup>13</sup>C NMR spectrum of compound **14b** (100.6 MHz, DMSO-*d*<sub>6</sub>)



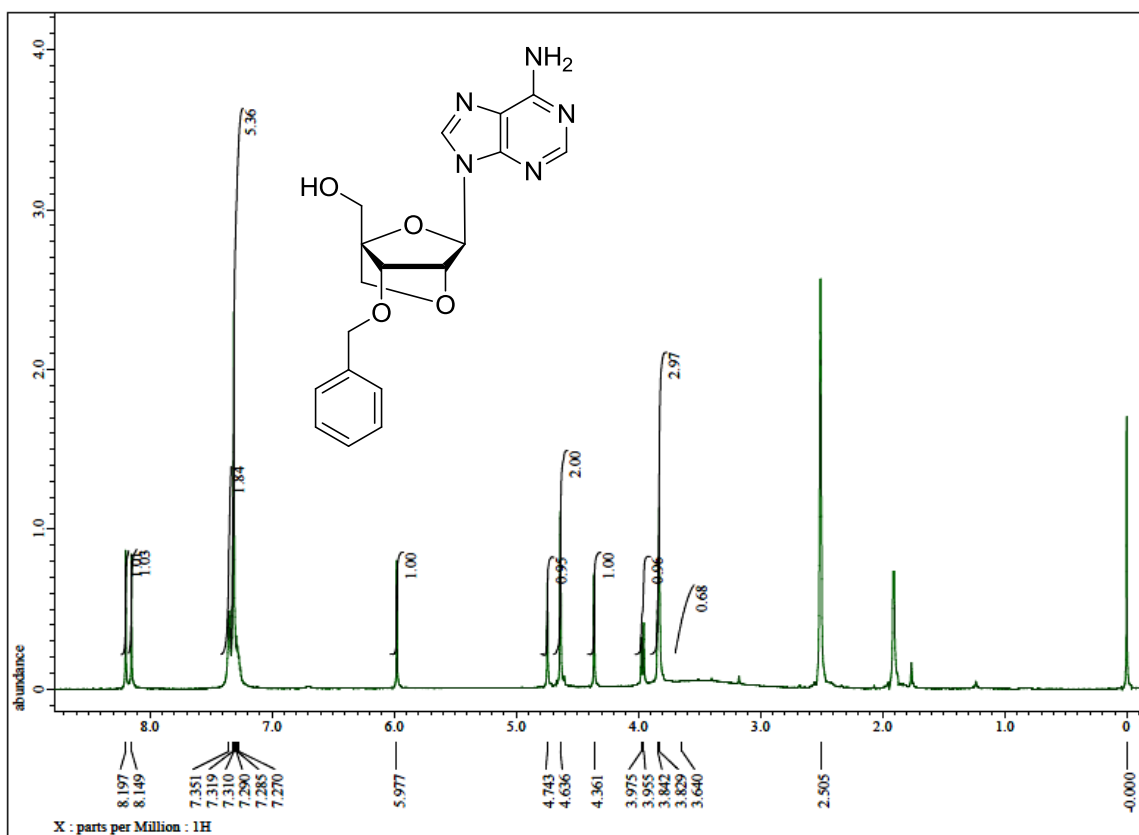

<sup>1</sup>H NMR spectrum of compound **14c** (400 MHz, DMSO-*d*<sub>6</sub>)

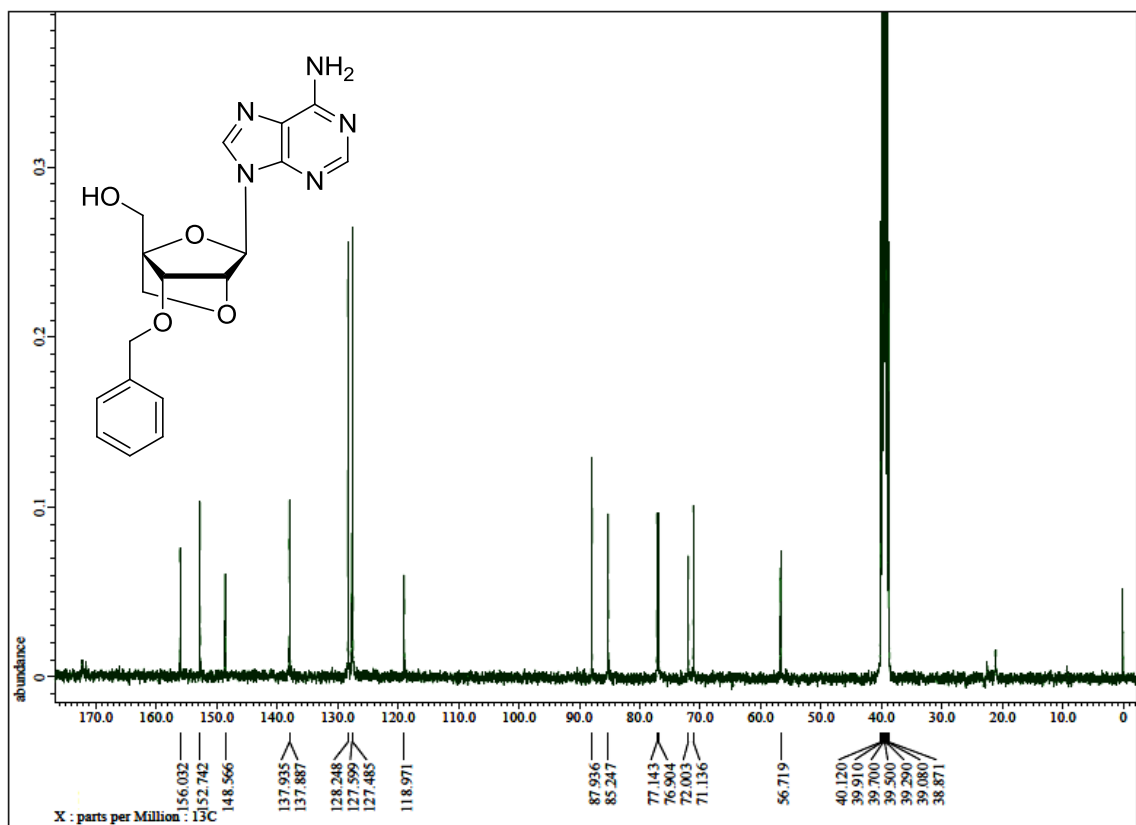

<sup>13</sup>C NMR spectrum of compound **14c** (100.6 MHz, DMSO-*d*<sub>6</sub>)

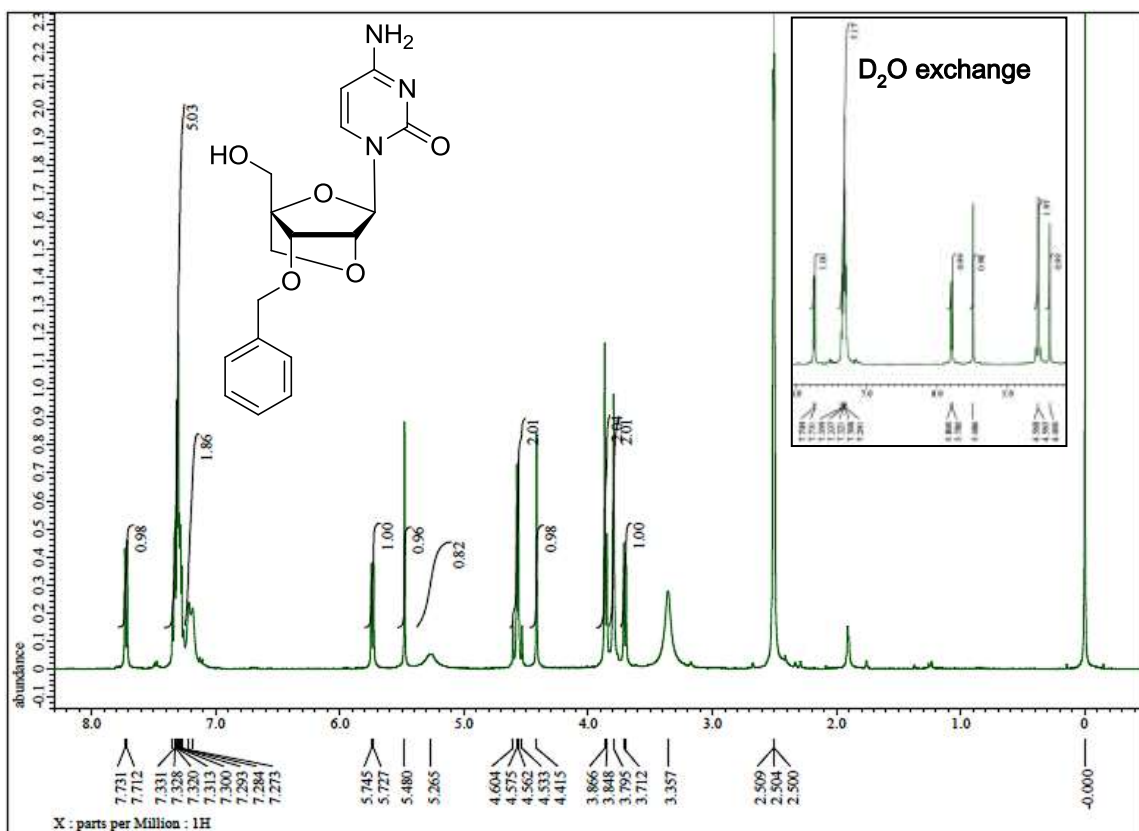

<sup>1</sup>H NMR spectrum of compound **14d** (400 MHz, DMSO-*d*<sub>6</sub>)

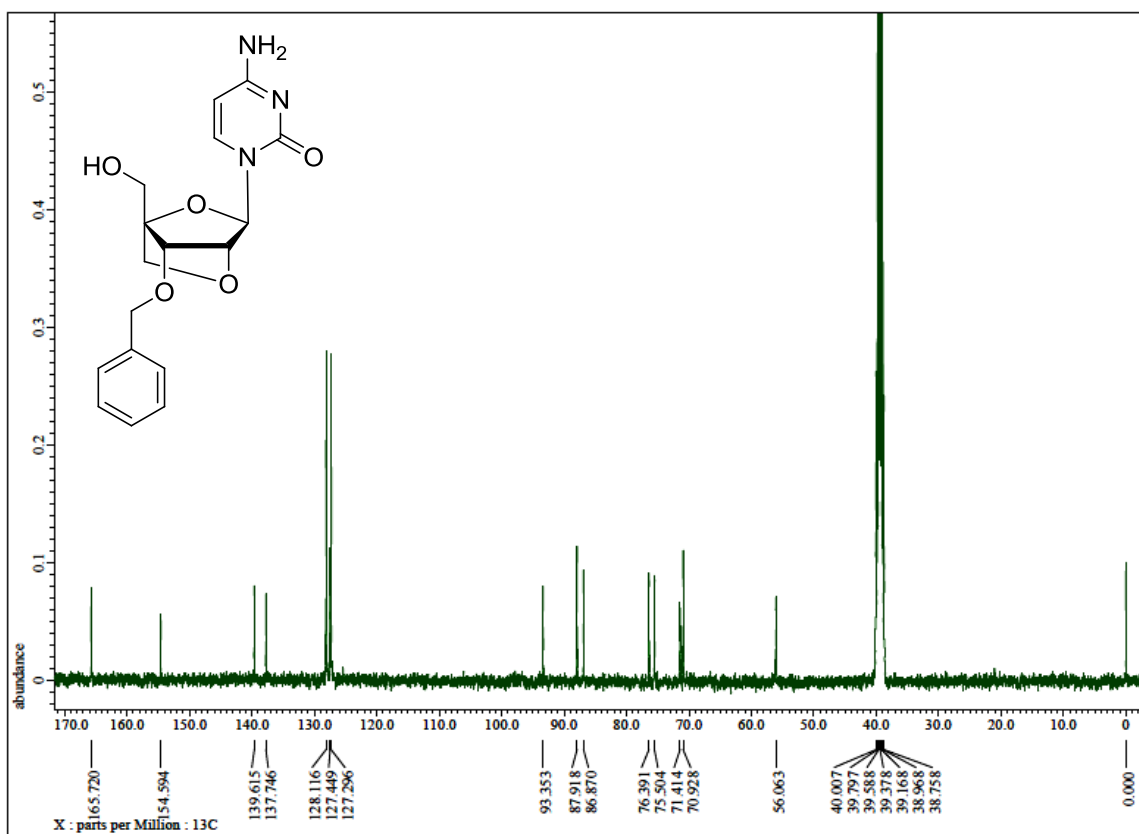

<sup>13</sup>C NMR spectrum of compound **14d** (100.6 MHz, DMSO-*d*<sub>6</sub>)

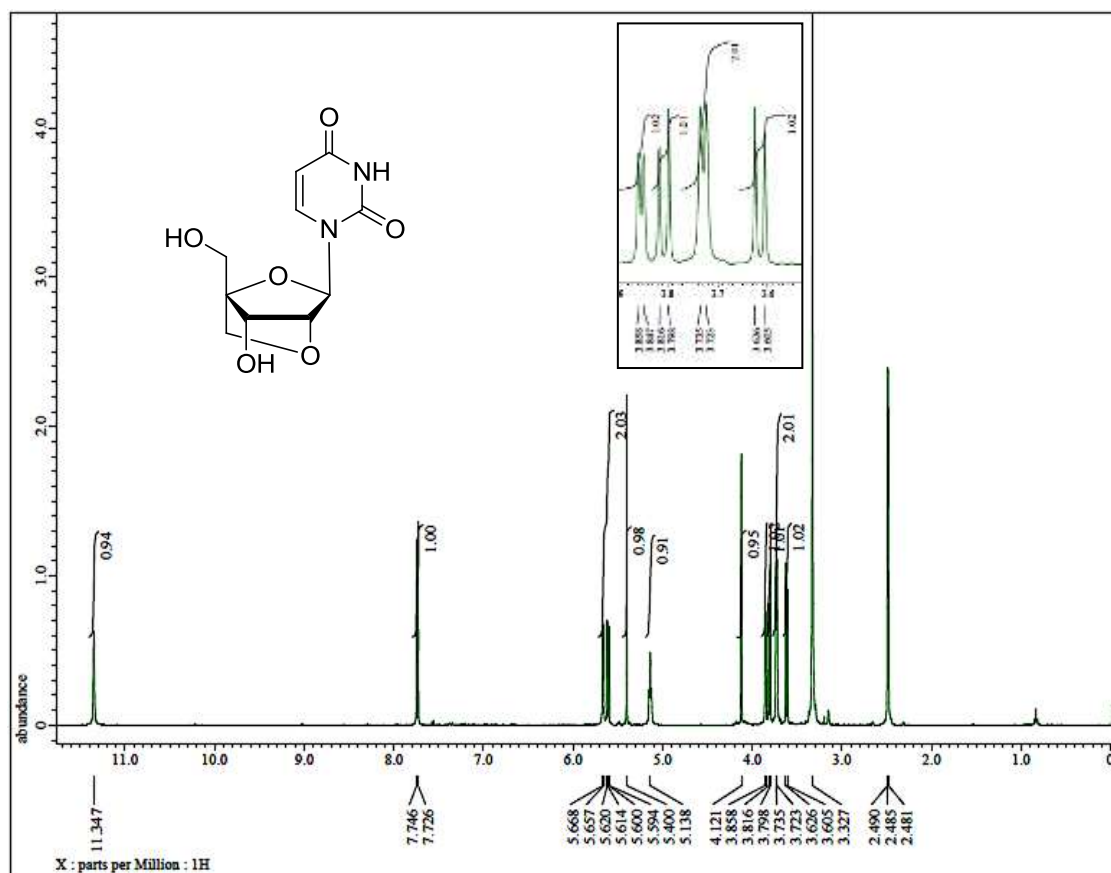

<sup>1</sup>H NMR spectrum of compound **15a** (400 MHz, DMSO-*d*<sub>6</sub>)

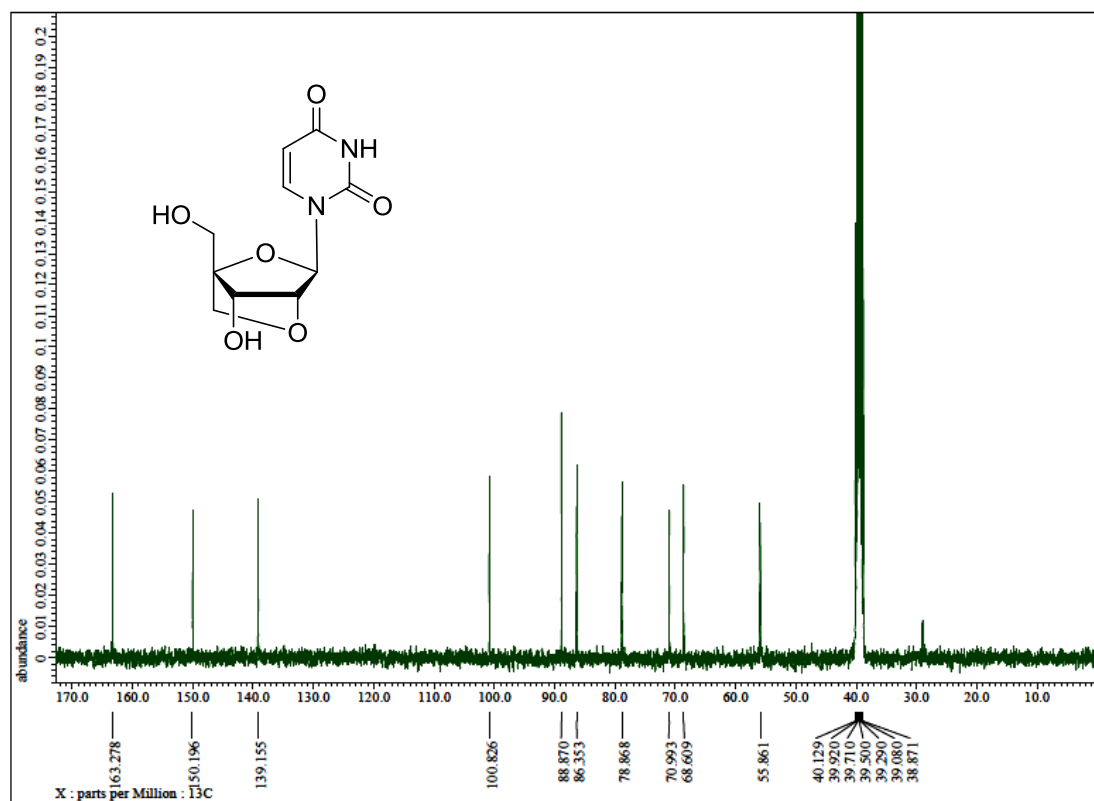

<sup>13</sup>C NMR spectrum of compound **15a** (100.6 MHz, DMSO-*d*<sub>6</sub>)

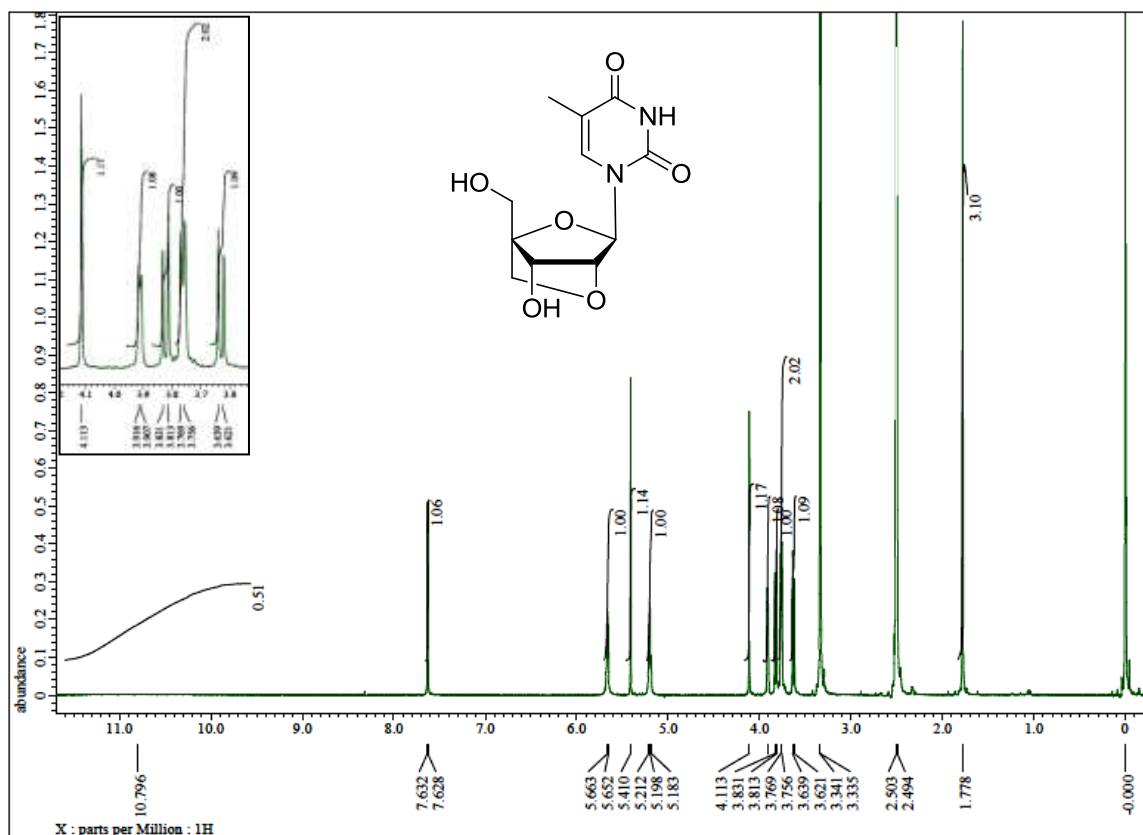

<sup>1</sup>H NMR spectrum of compound **15b** (400 MHz, DMSO-*d*<sub>6</sub>)

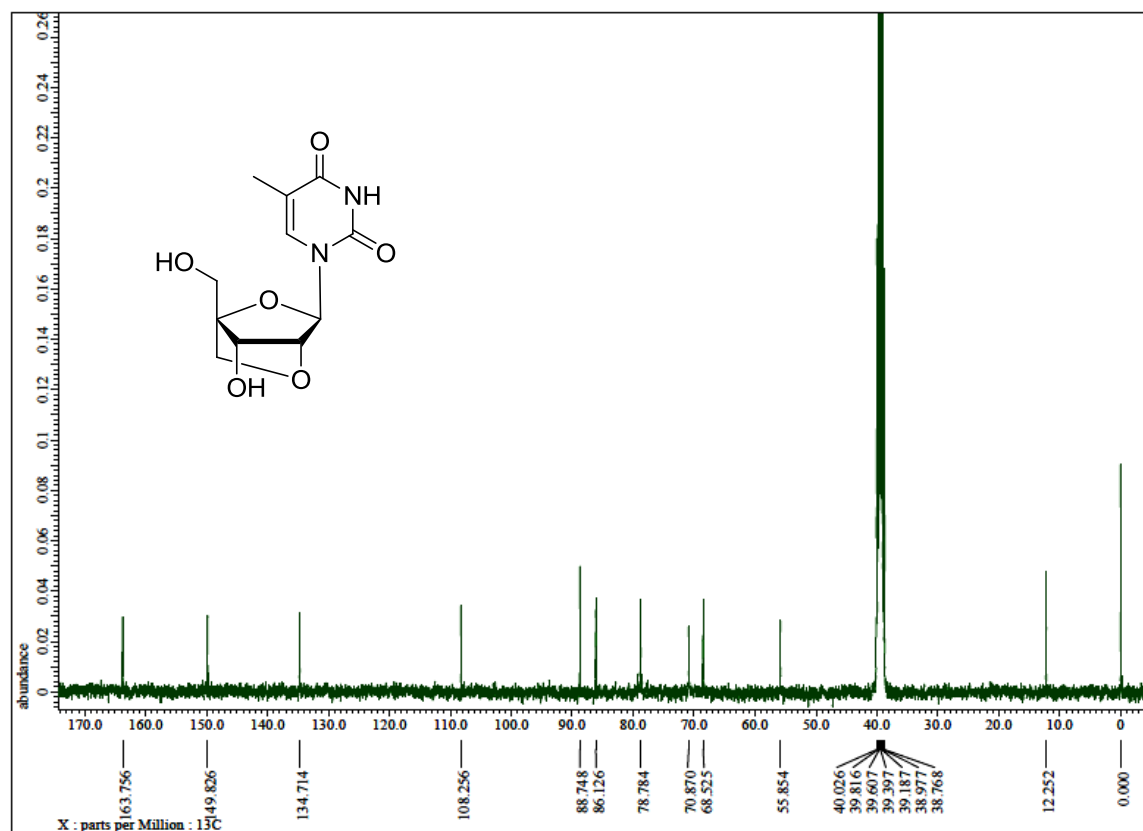

<sup>13</sup>C NMR spectrum of compound **15b** (100.6 MHz, DMSO-*d*<sub>6</sub>)

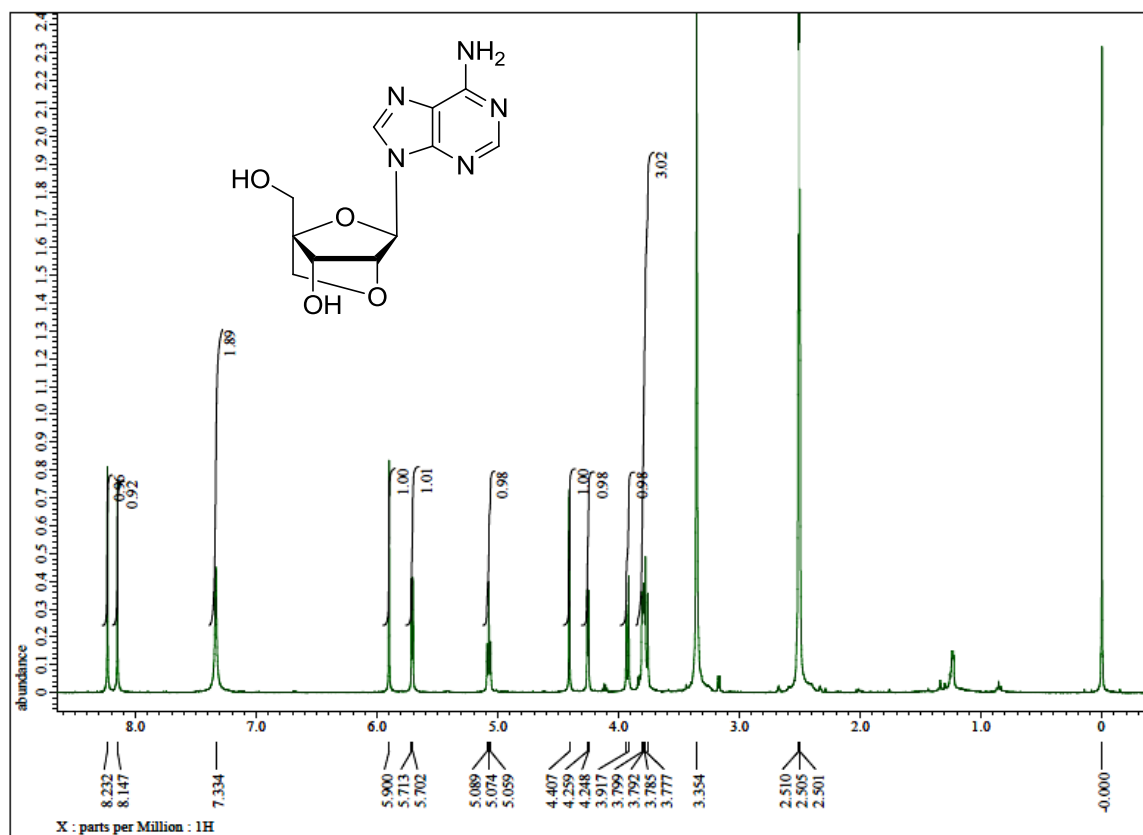

<sup>1</sup>H NMR spectrum of compound **15c** (400 MHz, DMSO-*d*<sub>6</sub>)

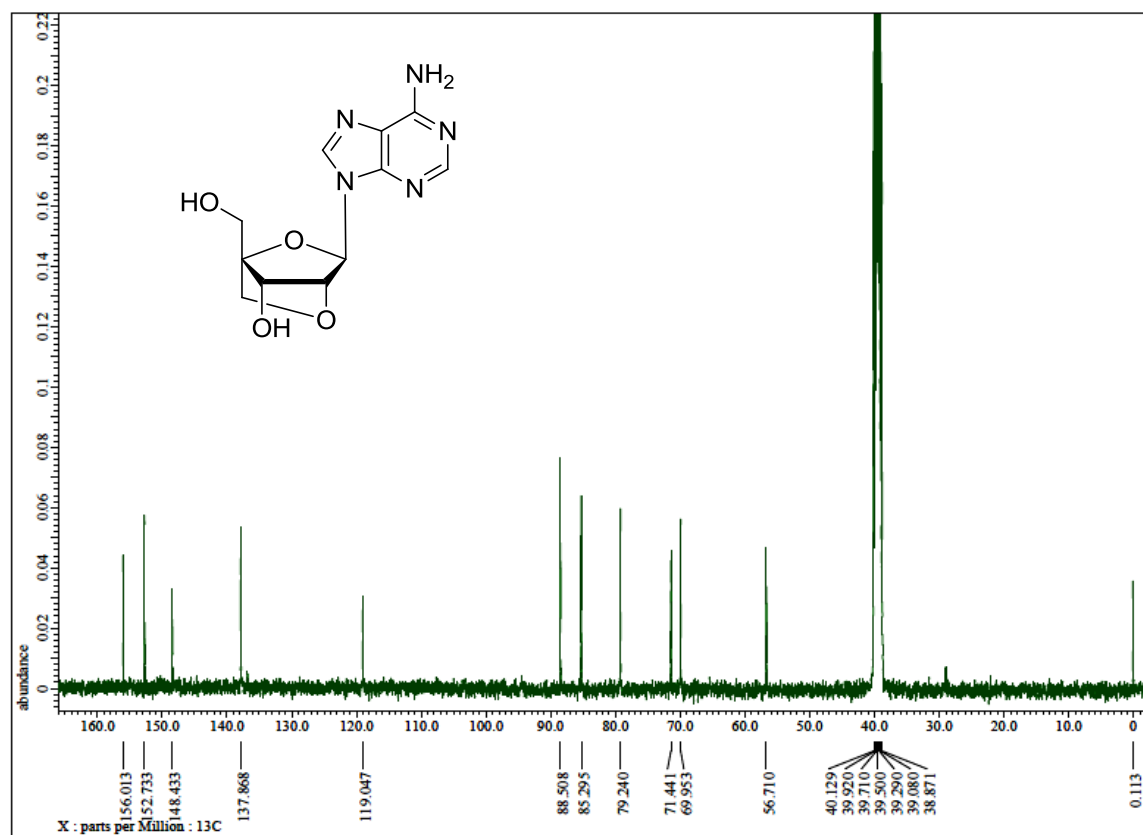

<sup>13</sup>C NMR spectrum of compound **15c** (100.6 MHz, DMSO-*d*<sub>6</sub>)

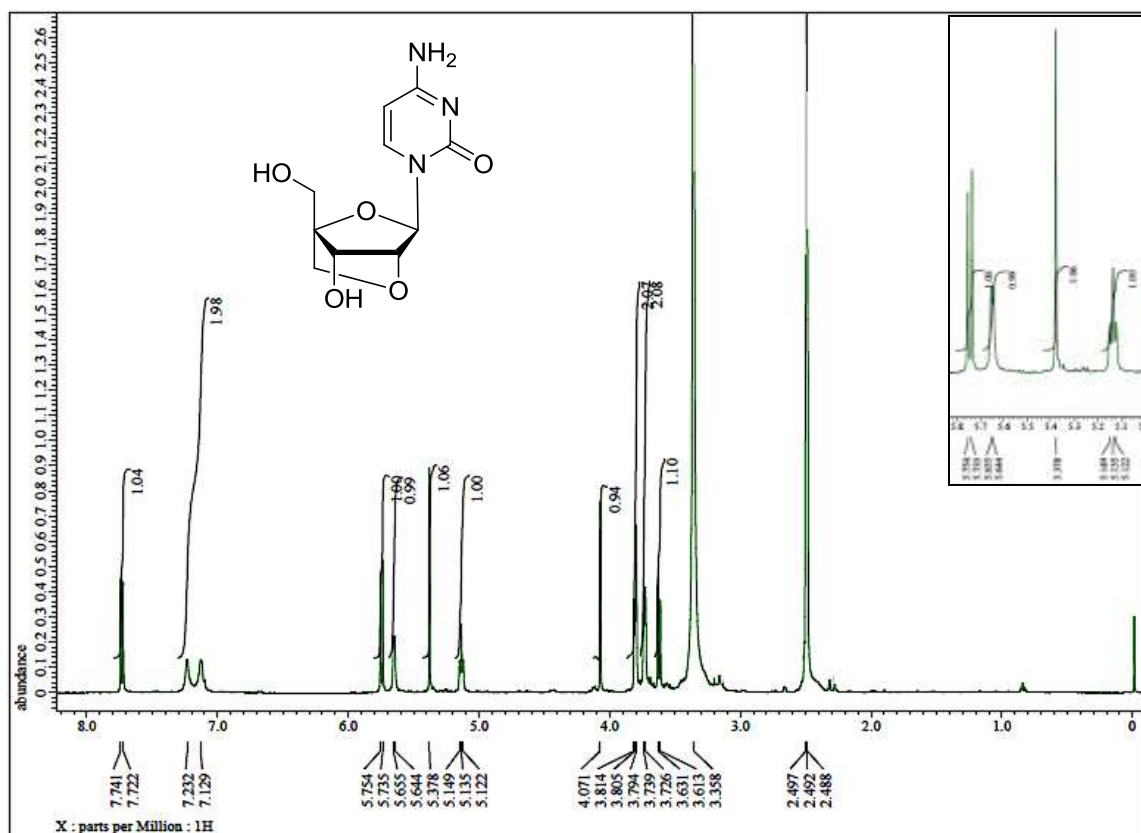

<sup>1</sup>H NMR spectrum of compound **15d** (400 MHz, DMSO-*d*<sub>6</sub>)

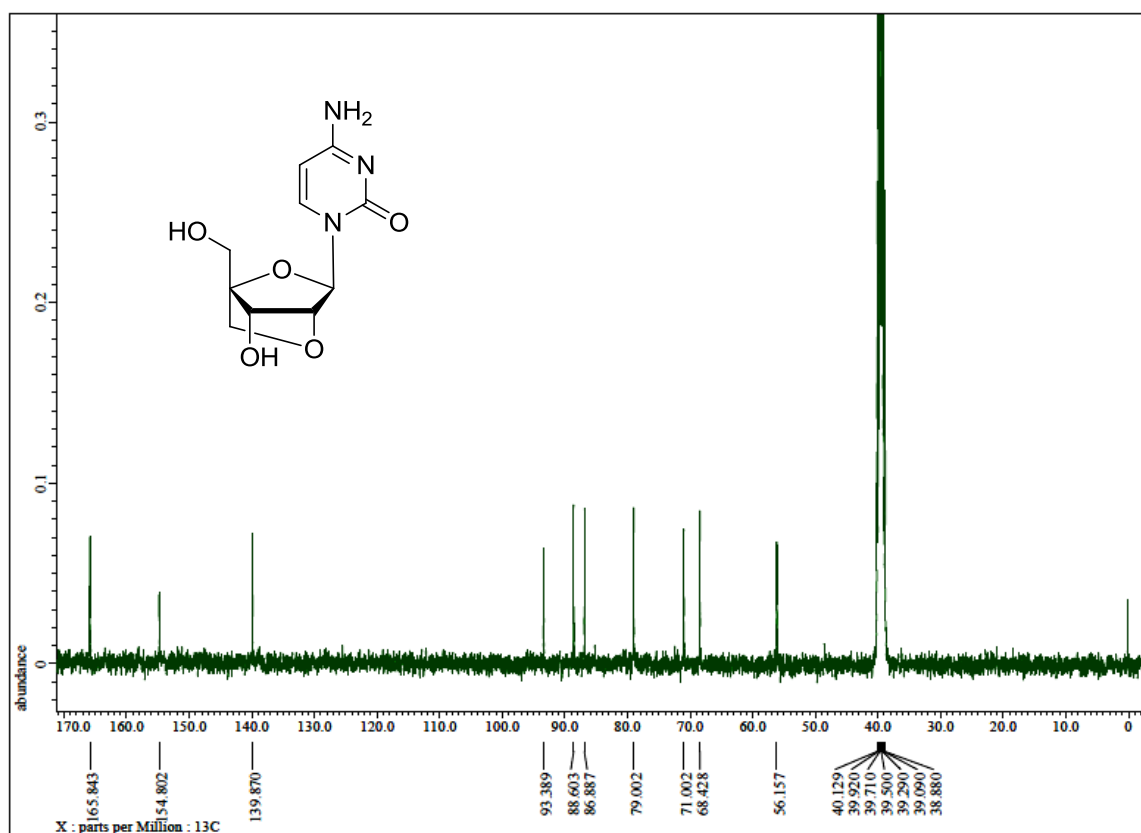

<sup>13</sup>C NMR spectrum of compound **15d** (100.6 MHz, DMSO-*d*<sub>6</sub>)

## References:

- (1) Kumar, T. S.; Kumar, P.; Sharma, P. K.; Hrdlicka P. J. *Tetrahedron Lett.* **2008**, 49, 7168.
- (2) A. A. Koshkin, J. Fensholdt, H. M. Pfundheller and C. Lomholt, *J. Org. Chem.*, 2001, **66**, 8504.
